# Supplementary material for: High temporal resolution Nanopore sequencing dataset of SARS-CoV-2 and host cell RNAs
Source: PubMed Central journal article supplement (PMC9575581; doi:10.1093/gigascience/giac094), 2022-10-17

## High Temporal-Resolution Nanopore Sequencing Dataset of SARS-CoV-2 and Host Cell RNAs

--Manuscript Draft--

|                                                      |                                                                                                                                                                                                                                                                                                                                                                                                                                                                                                                                                                                                                                                                                                                                                                                                                                                                                                                                                                                                                                                                                                                                                                                                                                                                                                                                                                                                                                                                                                                                                                                                                                                                                                                                                                                                                                                                                                                                                                                                                                                                                                                                                                                                                                                                         |                           |
|------------------------------------------------------|-------------------------------------------------------------------------------------------------------------------------------------------------------------------------------------------------------------------------------------------------------------------------------------------------------------------------------------------------------------------------------------------------------------------------------------------------------------------------------------------------------------------------------------------------------------------------------------------------------------------------------------------------------------------------------------------------------------------------------------------------------------------------------------------------------------------------------------------------------------------------------------------------------------------------------------------------------------------------------------------------------------------------------------------------------------------------------------------------------------------------------------------------------------------------------------------------------------------------------------------------------------------------------------------------------------------------------------------------------------------------------------------------------------------------------------------------------------------------------------------------------------------------------------------------------------------------------------------------------------------------------------------------------------------------------------------------------------------------------------------------------------------------------------------------------------------------------------------------------------------------------------------------------------------------------------------------------------------------------------------------------------------------------------------------------------------------------------------------------------------------------------------------------------------------------------------------------------------------------------------------------------------------|---------------------------|
| <b>Manuscript Number:</b>                            | GIGA-D-22-00028R1                                                                                                                                                                                                                                                                                                                                                                                                                                                                                                                                                                                                                                                                                                                                                                                                                                                                                                                                                                                                                                                                                                                                                                                                                                                                                                                                                                                                                                                                                                                                                                                                                                                                                                                                                                                                                                                                                                                                                                                                                                                                                                                                                                                                                                                       |                           |
| <b>Full Title:</b>                                   | High Temporal-Resolution Nanopore Sequencing Dataset of SARS-CoV-2 and Host Cell RNAs                                                                                                                                                                                                                                                                                                                                                                                                                                                                                                                                                                                                                                                                                                                                                                                                                                                                                                                                                                                                                                                                                                                                                                                                                                                                                                                                                                                                                                                                                                                                                                                                                                                                                                                                                                                                                                                                                                                                                                                                                                                                                                                                                                                   |                           |
| <b>Article Type:</b>                                 | Data Note                                                                                                                                                                                                                                                                                                                                                                                                                                                                                                                                                                                                                                                                                                                                                                                                                                                                                                                                                                                                                                                                                                                                                                                                                                                                                                                                                                                                                                                                                                                                                                                                                                                                                                                                                                                                                                                                                                                                                                                                                                                                                                                                                                                                                                                               |                           |
| <b>Funding Information:</b>                          | Nemzeti Kutatási Fejlesztési és Innovációs Hivatal (K 128247)                                                                                                                                                                                                                                                                                                                                                                                                                                                                                                                                                                                                                                                                                                                                                                                                                                                                                                                                                                                                                                                                                                                                                                                                                                                                                                                                                                                                                                                                                                                                                                                                                                                                                                                                                                                                                                                                                                                                                                                                                                                                                                                                                                                                           | Prof. Dr. Zsolt Boldogkői |
|                                                      | Nemzeti Kutatási Fejlesztési és Innovációs Hivatal (FK 128252)                                                                                                                                                                                                                                                                                                                                                                                                                                                                                                                                                                                                                                                                                                                                                                                                                                                                                                                                                                                                                                                                                                                                                                                                                                                                                                                                                                                                                                                                                                                                                                                                                                                                                                                                                                                                                                                                                                                                                                                                                                                                                                                                                                                                          | Dr. Dóra Tombác           |
|                                                      | University of Szeged (Open Access Fund 5654)                                                                                                                                                                                                                                                                                                                                                                                                                                                                                                                                                                                                                                                                                                                                                                                                                                                                                                                                                                                                                                                                                                                                                                                                                                                                                                                                                                                                                                                                                                                                                                                                                                                                                                                                                                                                                                                                                                                                                                                                                                                                                                                                                                                                                            | Prof. Dr. Zsolt Boldogkői |
| <b>Abstract:</b>                                     | <p><b>Background</b></p> <p>Recent studies have disclosed the genome, transcriptome and epigenetic compositions of severe acute respiratory syndrome coronavirus 2 (SARS-CoV-2) and the effect of viral infection on gene expression of the host cells. It has been demonstrated that, besides the major canonical transcripts, the viral genome also codes for non-canonical RNA molecules. While the structural characterizations have revealed a detailed transcriptomic architecture of the virus, the kinetic studies provided poor and often misleading results on the dynamics of both the viral and host transcripts due to the low temporal resolution of the infection event and the low virus/cell ratio (MOI=0.1) applied for the infection. It has never been tested whether the alteration in the host gene expressions is caused by aging of the cells, or by the viral infection.</p> <p><b>Findings</b></p> <p>In this study, we used Oxford Nanopore's direct cDNA and direct RNA sequencing methods for the generation of a high-coverage, high-temporal-resolution transcriptomic dataset of SARS-CoV-2 and of the primate host cells, using a high infection titer (MOI=5). Sixteen sampling time points ranging from 1 to 96 h with a varying time resolution and three biological replicates were used in the experiment. In addition, for each infected sample, corresponding non-infected samples were employed. The raw reads were mapped to the viral and to the host reference genomes, resulting in 49,661,499 mapped reads (54,62Gbs). The genome of the viral isolate was also sequenced and phylogenetically classified.</p> <p><b>Conclusions</b></p> <p>This dataset can serve as a valuable resource for profiling the SARS-CoV-2 transcriptome dynamics, the virus-host interactions and the RNA base modifications. Comparison of expression profiles of the host gene in the virally-infected and in non-infected cells at different time points allows to make a distinction between the effect of the aging of cells in culture and the viral infection. These data can provide useful information for potential novel gene annotations and can also be used for studying the currently available bioinformatics pipelines.</p> |                           |
| <b>Corresponding Author:</b>                         | Zsolt Boldogkői<br>Szegedi Tudományegyetem Általános Orvostudományi Kar<br>Szeged, HUNGARY                                                                                                                                                                                                                                                                                                                                                                                                                                                                                                                                                                                                                                                                                                                                                                                                                                                                                                                                                                                                                                                                                                                                                                                                                                                                                                                                                                                                                                                                                                                                                                                                                                                                                                                                                                                                                                                                                                                                                                                                                                                                                                                                                                              |                           |
| <b>Corresponding Author Secondary Information:</b>   |                                                                                                                                                                                                                                                                                                                                                                                                                                                                                                                                                                                                                                                                                                                                                                                                                                                                                                                                                                                                                                                                                                                                                                                                                                                                                                                                                                                                                                                                                                                                                                                                                                                                                                                                                                                                                                                                                                                                                                                                                                                                                                                                                                                                                                                                         |                           |
| <b>Corresponding Author's Institution:</b>           | Szegedi Tudományegyetem Általános Orvostudományi Kar                                                                                                                                                                                                                                                                                                                                                                                                                                                                                                                                                                                                                                                                                                                                                                                                                                                                                                                                                                                                                                                                                                                                                                                                                                                                                                                                                                                                                                                                                                                                                                                                                                                                                                                                                                                                                                                                                                                                                                                                                                                                                                                                                                                                                    |                           |
| <b>Corresponding Author's Secondary Institution:</b> |                                                                                                                                                                                                                                                                                                                                                                                                                                                                                                                                                                                                                                                                                                                                                                                                                                                                                                                                                                                                                                                                                                                                                                                                                                                                                                                                                                                                                                                                                                                                                                                                                                                                                                                                                                                                                                                                                                                                                                                                                                                                                                                                                                                                                                                                         |                           |
| <b>First Author:</b>                                 | Dóra Tombác, PhD                                                                                                                                                                                                                                                                                                                                                                                                                                                                                                                                                                                                                                                                                                                                                                                                                                                                                                                                                                                                                                                                                                                                                                                                                                                                                                                                                                                                                                                                                                                                                                                                                                                                                                                                                                                                                                                                                                                                                                                                                                                                                                                                                                                                                                                        |                           |

|                                                |                                                                                                                                                                                                                                                                                                                                                                                                                                                                                                                                                                                                                                                                                                                                                                                                                                                                                                                                                                                                                                                                                                                                                                                                                                                                                                                                                                                                                                                                                                                                                                                                                                                                                                                                                                                                                                                                                                                                                                                                                                                                                                                                                                                                                                                                                                                                                                                                                                                                                                                                                                                                                                                                                                                                                                                                                                                                                                                                                                                                                                                                                                                     |
|------------------------------------------------|---------------------------------------------------------------------------------------------------------------------------------------------------------------------------------------------------------------------------------------------------------------------------------------------------------------------------------------------------------------------------------------------------------------------------------------------------------------------------------------------------------------------------------------------------------------------------------------------------------------------------------------------------------------------------------------------------------------------------------------------------------------------------------------------------------------------------------------------------------------------------------------------------------------------------------------------------------------------------------------------------------------------------------------------------------------------------------------------------------------------------------------------------------------------------------------------------------------------------------------------------------------------------------------------------------------------------------------------------------------------------------------------------------------------------------------------------------------------------------------------------------------------------------------------------------------------------------------------------------------------------------------------------------------------------------------------------------------------------------------------------------------------------------------------------------------------------------------------------------------------------------------------------------------------------------------------------------------------------------------------------------------------------------------------------------------------------------------------------------------------------------------------------------------------------------------------------------------------------------------------------------------------------------------------------------------------------------------------------------------------------------------------------------------------------------------------------------------------------------------------------------------------------------------------------------------------------------------------------------------------------------------------------------------------------------------------------------------------------------------------------------------------------------------------------------------------------------------------------------------------------------------------------------------------------------------------------------------------------------------------------------------------------------------------------------------------------------------------------------------------|
| <b>First Author Secondary Information:</b>     |                                                                                                                                                                                                                                                                                                                                                                                                                                                                                                                                                                                                                                                                                                                                                                                                                                                                                                                                                                                                                                                                                                                                                                                                                                                                                                                                                                                                                                                                                                                                                                                                                                                                                                                                                                                                                                                                                                                                                                                                                                                                                                                                                                                                                                                                                                                                                                                                                                                                                                                                                                                                                                                                                                                                                                                                                                                                                                                                                                                                                                                                                                                     |
| <b>Order of Authors:</b>                       | Dóra Tombácz, PhD                                                                                                                                                                                                                                                                                                                                                                                                                                                                                                                                                                                                                                                                                                                                                                                                                                                                                                                                                                                                                                                                                                                                                                                                                                                                                                                                                                                                                                                                                                                                                                                                                                                                                                                                                                                                                                                                                                                                                                                                                                                                                                                                                                                                                                                                                                                                                                                                                                                                                                                                                                                                                                                                                                                                                                                                                                                                                                                                                                                                                                                                                                   |
|                                                | Ákos Dörmő                                                                                                                                                                                                                                                                                                                                                                                                                                                                                                                                                                                                                                                                                                                                                                                                                                                                                                                                                                                                                                                                                                                                                                                                                                                                                                                                                                                                                                                                                                                                                                                                                                                                                                                                                                                                                                                                                                                                                                                                                                                                                                                                                                                                                                                                                                                                                                                                                                                                                                                                                                                                                                                                                                                                                                                                                                                                                                                                                                                                                                                                                                          |
|                                                | Gábor Gulyás                                                                                                                                                                                                                                                                                                                                                                                                                                                                                                                                                                                                                                                                                                                                                                                                                                                                                                                                                                                                                                                                                                                                                                                                                                                                                                                                                                                                                                                                                                                                                                                                                                                                                                                                                                                                                                                                                                                                                                                                                                                                                                                                                                                                                                                                                                                                                                                                                                                                                                                                                                                                                                                                                                                                                                                                                                                                                                                                                                                                                                                                                                        |
|                                                | Zsolt Csabai, PhD                                                                                                                                                                                                                                                                                                                                                                                                                                                                                                                                                                                                                                                                                                                                                                                                                                                                                                                                                                                                                                                                                                                                                                                                                                                                                                                                                                                                                                                                                                                                                                                                                                                                                                                                                                                                                                                                                                                                                                                                                                                                                                                                                                                                                                                                                                                                                                                                                                                                                                                                                                                                                                                                                                                                                                                                                                                                                                                                                                                                                                                                                                   |
|                                                | István Prazsák, PhD                                                                                                                                                                                                                                                                                                                                                                                                                                                                                                                                                                                                                                                                                                                                                                                                                                                                                                                                                                                                                                                                                                                                                                                                                                                                                                                                                                                                                                                                                                                                                                                                                                                                                                                                                                                                                                                                                                                                                                                                                                                                                                                                                                                                                                                                                                                                                                                                                                                                                                                                                                                                                                                                                                                                                                                                                                                                                                                                                                                                                                                                                                 |
|                                                | Balázs Kakuk                                                                                                                                                                                                                                                                                                                                                                                                                                                                                                                                                                                                                                                                                                                                                                                                                                                                                                                                                                                                                                                                                                                                                                                                                                                                                                                                                                                                                                                                                                                                                                                                                                                                                                                                                                                                                                                                                                                                                                                                                                                                                                                                                                                                                                                                                                                                                                                                                                                                                                                                                                                                                                                                                                                                                                                                                                                                                                                                                                                                                                                                                                        |
|                                                | Ákos Harangozó                                                                                                                                                                                                                                                                                                                                                                                                                                                                                                                                                                                                                                                                                                                                                                                                                                                                                                                                                                                                                                                                                                                                                                                                                                                                                                                                                                                                                                                                                                                                                                                                                                                                                                                                                                                                                                                                                                                                                                                                                                                                                                                                                                                                                                                                                                                                                                                                                                                                                                                                                                                                                                                                                                                                                                                                                                                                                                                                                                                                                                                                                                      |
|                                                | István Jankovics, MD                                                                                                                                                                                                                                                                                                                                                                                                                                                                                                                                                                                                                                                                                                                                                                                                                                                                                                                                                                                                                                                                                                                                                                                                                                                                                                                                                                                                                                                                                                                                                                                                                                                                                                                                                                                                                                                                                                                                                                                                                                                                                                                                                                                                                                                                                                                                                                                                                                                                                                                                                                                                                                                                                                                                                                                                                                                                                                                                                                                                                                                                                                |
|                                                | Béla Dénes, PhD                                                                                                                                                                                                                                                                                                                                                                                                                                                                                                                                                                                                                                                                                                                                                                                                                                                                                                                                                                                                                                                                                                                                                                                                                                                                                                                                                                                                                                                                                                                                                                                                                                                                                                                                                                                                                                                                                                                                                                                                                                                                                                                                                                                                                                                                                                                                                                                                                                                                                                                                                                                                                                                                                                                                                                                                                                                                                                                                                                                                                                                                                                     |
|                                                | Zsolt Boldogkői, PhD                                                                                                                                                                                                                                                                                                                                                                                                                                                                                                                                                                                                                                                                                                                                                                                                                                                                                                                                                                                                                                                                                                                                                                                                                                                                                                                                                                                                                                                                                                                                                                                                                                                                                                                                                                                                                                                                                                                                                                                                                                                                                                                                                                                                                                                                                                                                                                                                                                                                                                                                                                                                                                                                                                                                                                                                                                                                                                                                                                                                                                                                                                |
| <b>Order of Authors Secondary Information:</b> |                                                                                                                                                                                                                                                                                                                                                                                                                                                                                                                                                                                                                                                                                                                                                                                                                                                                                                                                                                                                                                                                                                                                                                                                                                                                                                                                                                                                                                                                                                                                                                                                                                                                                                                                                                                                                                                                                                                                                                                                                                                                                                                                                                                                                                                                                                                                                                                                                                                                                                                                                                                                                                                                                                                                                                                                                                                                                                                                                                                                                                                                                                                     |
| <b>Response to Reviewers:</b>                  | <p>Dear Editor,</p> <p>We would like to thank the reviewers for their time spent on reviewing our manuscript and their helpful comments and suggestions. We have addressed and agreed with each comment below and hope it now satisfies the requirements for publication in GigaScience. Our point-by-point responses to the comments are listed below and the changes have been marked in blue in the revised version of the manuscript.</p> <p>Reviewer #1:</p> <p>In this work, Tombacz et al. provide a Nanopore RNA sequencing dataset of SARS-CoV-2 infected cells in several timepoints and sequencing setups. Both direct RNA-seq and cDNA-seq techniques have been utilized, and multiplex barcoded sequencing has been done for combining the samples. The dataset can be helpful to the community, such as for future transcriptomic studies of SARS-CoV-2, especially for studying the infection and expression dynamics. The text is well written and easy to follow. I find this work valuable; however, I can see several limitations in the analysis and representation of the results. Notably, the figures and tables representing statistical and biological insights of the data points are underworked, lack clarity, and provide limited information about the experiment. Further visualizations, analysis, and data processing could help to reveal the value and insights from this sequencing experiment.</p> <p>We agree with all of the suggestions and revised the manuscript accordingly.</p> <p>1. The presentation of reads coverage and lengths in Figs 1 &amp; 2 are elementary, unpolished, and non-informative. Better annotation and labeling in Fig. 1 would be needed. Stacking so many violin plots in Fig 2 does not provide any valuable information and would only misguide. What are the messages of these figures? What do the authors expect the readers to catch from them? As noted, stacking many similar figures does not add further information. The authors may want to consider alternative representations and aggregation of the information, besides or replacing the current plots. For example, in Fig.2, scatter/line plots for the median &amp; 25/75% percentile ranges, with an aggregation of the three replicates in on x-axis position, could help identify potential trends over the time points.</p> <p>- Figures 1 and 2 (Figures 4 and 5 in the revised manuscript) have been changed, as suggested. In Figure 4, the three biological replicates of each time point have been merged. More details to the annotation have been added: the 16 non-structural proteins encoded by the ORF1a and 1b have been labelled. In Figure 5, The violin plots have been replaced by a line charts, and the 25/75% percentile ranges have also been indicated.</p> <p>2. It is better to start the paper by presenting the current Fig.3 as the first one. This figure is the core of contributions and methodologies, and current Figs 1&amp;2 are logical followups of this step.</p> <p>- We have changed the order of the figures, as suggested.</p> |

3. There is a very limited description in the Figure Legends. The reader should be able to understand essential elements of the figures merely based on the Figure and its legend.

- Additional information have been added to the Figure Legends to improve the understanding.

4. This study does not provide much notable biological insight without demultiplexing the reads of each experimental condition into genomic and subgenomic subsets. Distinguishing the genomic and subgenomic reads and analyzing their relative ratio is essential in this temporal study. Due to the transcription process of coronaviruses, the genomic and subgenomic reads have very different characteristics, such as length distribution and cellular presence. Genomic and sub-genomic reads can be reliably identified by their coverage and splicing profiles, for enough long reads. It is essential that the authors further process the data by categorizing the genomic/subgenomic reads and the provide statistics such as read length for each category. It would also be interesting to observe the ratio of genomic vs. subgenomic reads. This is an indicative metric of the infection state of the sample. An active infection has a higher sub-genomic share, while, e.g., a very early infection stage is expected to have a larger portion of genomic reads.

- The genomic and subgenomic reads have been identified and the temporal changes of their ratios were calculated and visualized (see details in the manuscripts). Due to the preference of the oligo(dT) primer-based long-read sequencing towards the short reads, the long reads are significantly underrepresented compared to the short ones. However, the changes in the ratios of subgenomic/genomic reads in time can provide important information on the replication and transcription of the virus.

5. Page-3: "[.] the nested set of subgenomic RNAs (sgRNAs) mapping to the 3'-third of the viral genome". Is 3'-third a typo? Otherwise, the text is not understandable.

- We have corrected the text.

6. Page-4: " because after a couple of hours, the virus can initiate a new infection cycle within the non-infected cells." More context and elaboration by citing some references can help to support the authors' claim. A gradual infection of non-infected cells can be assumed. However, "a couple of hours" and "initiate a new infection cycle" need further support in a scientific manuscript. The infection process is fairly gradual, but the wording here infers a sudden transition to infecting other cells only at a particular time point.

- We have modified the text and added a novel reference. We agree, the new infection is indeed gradual because the viral particles are continuously released from the infected cells. This phenomenon is discussed in the case of other viruses, such as in influenza virus: <https://www.ncbi.nlm.nih.gov/pmc/articles/PMC3840122/>

7. Page-4: "[.] undergo alterations non-infected cells during the propagation therefore, we cannot decide whether the transcriptional changes in infected are due to the effect of the virus or to the time factor of culturing." This can be strong support for why this experiment has been done and for the value of this dataset. I would suggest mentioning this in the abstract to highlight the motivation.

- We have included this information to the abstract.

8. Page-4: "based studies have revealed a hidden transcriptional complexity in viruses [13,14]"

Besides Kim et. al, the first DRS experiments of coronaviruses have not been cited (doi.org/10.1101/gr.247064.118, doi.org/10.1101/2020.07.18.204362, doi.org/10.1101/2020.03.05.976167)

- The suggested references have been added to the revised manuscript.

9. Table-1: dcDNA is quite an uncommon term. In general, here and elsewhere in the

text, insisting on a \*direct\* cDNA is a bit misleading. A "direct" cDNA sequencing is still an indirect sequencing of RNA molecules!

- We applied the terminology used by Oxford Nanopore Technologies in those sequencing when no PCR amplifications were applied. The terminology "direct (d)cDNA sequencing" is introduced by the Oxford Nanopore Technologies and it is commonly used for the non-amplified cDNA technique. See for example here: <https://www.nature.com/articles/s41587-021-01108-x>. Although, we agree with the reviewer that this terminology can be misleading since it is indeed not 'direct'. We have added a definition to the text to clarify that the 'direct cDNA sequencing' is also termed as 'non-amplified cDNA sequencing'.

10. Figs S2 and S3: Please also report the ratio of virus to host reads.

- A novel figure (Supplementary Figure S3) containing the requested data has been added to the revised manuscript. In the revised manuscript, Supplementary Figures S2 and S3 became Supplementary Figures S4 and S5, respectively.

Reviewer #2:

1. The authors provide a potentially useful dataset relating to transcripts from cultured SARS-CoV-2 material in a commonly used cell line (Vero). Relevant sequence data are publicly available and descriptions on the preparation of these data are for the most part detailed and adequate, although this is lacking at times. Although the authors state that this dataset overcomes the limitations of available transcriptomic datasets, I do not believe this to be an accurate statement; based on comparable published work in this cell line, transcriptional activity is expected to peak at approximately one day post infection (Chang et al. 2021, Transcriptional and epi-transcriptional dynamics of SARS-CoV-2 during cellular infection), with the 96 hour period of infection described likely representing overlapping cellular infections of different stages. Secondly, many in the field have moved to use more appropriate cell lines in place of the Vero African Monkey kidney cell line, to better reflect changes in transcription during the course of infection in human and/or lung epithelial cells (See Finkel et al. 2020, The coding capacity of SARS-CoV-2). Lastly, the study would ideally be performed with a publicly available SARS-CoV-2 strain, as has been the case for earlier studies of this nature to allow for reproducibility and extension of the work presented by others. That said, the data are publicly available and could be of use.

- First of all, Chang and co-workers examined only three different time-points after infection (2, 24, and 48 hours post-infection). In contrast, we carried out a high temporal resolution experiment using 16 time points, which provides more precise information on the replication and transcription kinetics of SARS-CoV-2. Additionally, these authors used a low multiplicity of infection (MOI=0.1) for the infection, which allows the initiation of additional replication cycles at the late time points (24 and 48 hours post-infection). In our study we applied high MOI (5 pfu/cell) in order to avoid this possibility. Indeed, multiple cell lines are used for the studies of SARS-CoV-2 replication and transcription. Vero is a frequent choice, and therefore an appropriate model with respect of the reproducibility. Additionally, using various cell lines for the propagation of the virus can be useful for the better understanding the complexity and dynamics of SARS-CoV-2 transcriptome. We do not believe that, except some differences in the sequences, the transcriptomes of the various SARS-CoV-2 variants would differ significantly. However, if that were the case, it would be beneficial for better understanding the viral strategies.

Primary comments

2. I think that a statement detailing the ethics approval for this work would be essential, given materials used were collected from posthumously from a patient. Similarly, were these studies performed under appropriate containment, given classifications of SARS-CoV-2 at the time of the study?

- We have added the requested information to the revised manuscript.

3. I do not know what the authors mean in reference to a 'mixed time point sample' for the one direct RNA sample in this study; could this please be clarified?

|  |                                                                                                                                                                                                                                                                                                                                                                                                                                                                                                                                                                                                                                                                                                                                                                                                                                                                                                                                                                                                                                                                                                                                                                                                                                                                                                                                                                                                                                                                                                                                                                                                                                                                                                                                                                                                                                                                                                                                              |
|--|----------------------------------------------------------------------------------------------------------------------------------------------------------------------------------------------------------------------------------------------------------------------------------------------------------------------------------------------------------------------------------------------------------------------------------------------------------------------------------------------------------------------------------------------------------------------------------------------------------------------------------------------------------------------------------------------------------------------------------------------------------------------------------------------------------------------------------------------------------------------------------------------------------------------------------------------------------------------------------------------------------------------------------------------------------------------------------------------------------------------------------------------------------------------------------------------------------------------------------------------------------------------------------------------------------------------------------------------------------------------------------------------------------------------------------------------------------------------------------------------------------------------------------------------------------------------------------------------------------------------------------------------------------------------------------------------------------------------------------------------------------------------------------------------------------------------------------------------------------------------------------------------------------------------------------------------|
|  | <p>- The text has been clarified.</p> <p>Secondary comments</p> <p>4. I believe the authors may over-simplify discontinuous extension of minus strands in saying that 'The gRNA and the sgRNAs have common 3'-termini since the RdRP synthesizes the positive sense RNAs from this end of the genome'. Each of the 5' and 3' sequence of gRNAs/sgRNAs are shared through this process of replication.</p> <p>- We agree with this comment and the text has been corrected as suggested.</p> <p>5. 'Infections are typically carried out using fresh, rapidly growing cells, and fresh cultures are also used as mock-infected cells. However, gene expression profiles may undergo alterations non-infected cells during the propagation therefore, we cannot decide whether the transcriptional changes in infected are due to the effect of the virus or to the time factor of culturing. This phenomenon is practically never tested in the experiments.' I do not follow what these sentences are referring to.</p> <p>- We have modified the text to be more understandable. We note that the other Reviewer considered this experimental design so important that he/she recommended to include this information in the abstract.</p> <p>6. 'Altogether, we generated almost 64 million long-reads, from which more than 1.8 million reads mapped to the SARS-CoV-2 and almost 48 million to the host reference genome, respectively (Table 1). The obtained read count resulted in a very high coverage across the viral genome (Figure 1). Detailed data on the read counts, quality of reads including read lengths (Figure 2), insertions, deletions, as well as mismatches are summarized in Supplementary Tables.' Could this perhaps be more appropriately placed in the data analysis section, rather than background?</p> <p>- This part of the background section has been moved to the analysis part of the manuscript.</p> |
|--|----------------------------------------------------------------------------------------------------------------------------------------------------------------------------------------------------------------------------------------------------------------------------------------------------------------------------------------------------------------------------------------------------------------------------------------------------------------------------------------------------------------------------------------------------------------------------------------------------------------------------------------------------------------------------------------------------------------------------------------------------------------------------------------------------------------------------------------------------------------------------------------------------------------------------------------------------------------------------------------------------------------------------------------------------------------------------------------------------------------------------------------------------------------------------------------------------------------------------------------------------------------------------------------------------------------------------------------------------------------------------------------------------------------------------------------------------------------------------------------------------------------------------------------------------------------------------------------------------------------------------------------------------------------------------------------------------------------------------------------------------------------------------------------------------------------------------------------------------------------------------------------------------------------------------------------------|

**Additional Information:**

| Question                                                                                                                                                                                                                                                                                                                                                                                                                           | Response |
|------------------------------------------------------------------------------------------------------------------------------------------------------------------------------------------------------------------------------------------------------------------------------------------------------------------------------------------------------------------------------------------------------------------------------------|----------|
| Are you submitting this manuscript to a special series or article collection?                                                                                                                                                                                                                                                                                                                                                      | No       |
| <p><b>Experimental design and statistics</b></p> <p>Full details of the experimental design and statistical methods used should be given in the Methods section, as detailed in our <a href="#">Minimum Standards Reporting Checklist</a>. Information essential to interpreting the data presented should be made available in the figure legends.</p> <p>Have you included all the information requested in your manuscript?</p> | Yes      |
| <p><b>Resources</b></p> <p>A description of all resources used, including antibodies, cell lines, animals and software tools, with enough</p>                                                                                                                                                                                                                                                                                      | Yes      |

|                                                                                                                                                                                                                                                                                                                                                                                                                                                                                                                                                         |            |
|---------------------------------------------------------------------------------------------------------------------------------------------------------------------------------------------------------------------------------------------------------------------------------------------------------------------------------------------------------------------------------------------------------------------------------------------------------------------------------------------------------------------------------------------------------|------------|
| <p>information to allow them to be uniquely identified, should be included in the Methods section. Authors are strongly encouraged to cite <a href="#">Research Resource Identifiers</a> (RRIDs) for antibodies, model organisms and tools, where possible.</p> <p>Have you included the information requested as detailed in our <a href="#">Minimum Standards Reporting Checklist</a>?</p>                                                                                                                                                            |            |
| <p><b>Availability of data and materials</b></p> <p>All datasets and code on which the conclusions of the paper rely must be either included in your submission or deposited in <a href="#">publicly available repositories</a> (where available and ethically appropriate), referencing such data using a unique identifier in the references and in the “Availability of Data and Materials” section of your manuscript.</p> <p>Have you have met the above requirement as detailed in our <a href="#">Minimum Standards Reporting Checklist</a>?</p> | <p>Yes</p> |

# High Temporal-Resolution Nanopore Sequencing Dataset of SARS-CoV-2 and Host Cell RNAs

Dóra Tombácz<sup>1</sup>, Ákos Dörmő<sup>1</sup>, Gábor Gulyás<sup>1</sup>, Zsolt Csabai<sup>1</sup>, István Prazsák<sup>1</sup>, Balázs Kakuk<sup>1</sup>,  
Ákos Harangozó<sup>1</sup>, István Jankovics<sup>2</sup>, Béla Dénes<sup>3</sup>, Zsolt Boldogkői<sup>1\*</sup>

Dóra Tombácz [0000-0001-5520-2978]; Ákos Dörmő [0000-0003-1860-1122]; Gábor Gulyás [0000-0002-7465-7932]; Zsolt Csabai [0000-0003-0031-0116]; István Prazsák [0000-0003-3195-503X]; Balázs Kakuk [0000-0002-4314-5707]; Ákos Harangozó [0000-0001-8499-8485]; István Jankovics [0000-0001-5329-9294]; Béla Dénes [0000-0002-9889-529X]; Zsolt Boldogkői [0000-0003-1184-7293]

<sup>1</sup>Department of Medical Biology, Albert Szent-Györgyi Medical School, University of Szeged, Somogyi B. u. 4., 6720 Szeged, Hungary

<sup>2</sup>Complex Medical Center, 1012 Budapest, Kuny Domonkos u. 13-15, Hungary

<sup>3</sup>Veterinary Diagnostic Directorate, National Food Chain Safety Office, 1143 Budapest, Tábornok u. 2, Hungary

## E-Mails:

DT: [tombacz.dora@med.u-szeged.hu](mailto:tombacz.dora@med.u-szeged.hu)

ÁD: [dormo.akos@med.u-szeged.hu](mailto:dormo.akos@med.u-szeged.hu)

GG: [gulyas.gabor@med.u-szeged.hu](mailto:gulyas.gabor@med.u-szeged.hu)

ZC: [csabai.zsolt@med.u-szeged.hu](mailto:csabai.zsolt@med.u-szeged.hu)

IP: [prazsak.istvan@med.u-szeged.hu](mailto:prazsak.istvan@med.u-szeged.hu)

BK: [kakuk.balazs@med.u-szeged.hu](mailto:kakuk.balazs@med.u-szeged.hu)

ÁH: [harangozoa5@gmail.com](mailto:harangozoa5@gmail.com)

IJ: [jankovics.istvan@nnk.gov.hu](mailto:jankovics.istvan@nnk.gov.hu)

BD: [denesb@nebih.gov.hu](mailto:denesb@nebih.gov.hu)

ZB: [boldogkoi.zsolt@med.u-szeged.hu](mailto:boldogkoi.zsolt@med.u-szeged.hu)

\*Corresponding author: ZB

## Abstract

**Background** Recent studies have disclosed the genome, transcriptome and epigenetic compositions of severe acute respiratory syndrome coronavirus 2 (SARS-CoV-2) and the effect of viral infection on gene expression of the host cells. It has been demonstrated that, besides the major canonical transcripts, the viral genome also codes for non-canonical RNA molecules. While the structural characterizations have revealed a detailed transcriptomic architecture of the virus, the kinetic studies provided poor and often misleading results on the dynamics of both the viral and host transcripts due to the low temporal resolution of the infection event and the low virus/cell ratio (MOI=0.1) applied for the infection. [It has never been tested whether the alteration in the host gene expressions is caused by aging of the cells, or by the viral infection.](#)

**Findings** [In this study, we used Oxford Nanopore's direct cDNA and direct RNA sequencing methods for the generation of a high-coverage, high-temporal-resolution transcriptomic dataset of SARS-CoV-2 and of the primate host cells, using a high infection titer \(MOI=5\). Sixteen sampling time points ranging from 1 to 96 h with a varying time resolution and three biological replicates were used in the experiment. In addition, for each infected sample, corresponding non-infected samples were employed. The raw reads were mapped to the viral and to the host reference genomes, resulting in 49,661,499 mapped reads \(54,62Gbs\). The genome of the viral isolate was also sequenced and phylogenetically classified.](#)



**Conclusions** This dataset can serve as a valuable resource for profiling the SARS-CoV-2 transcriptome dynamics, the virus-host interactions and the RNA base modifications. [Comparison of expression profiles of the host gene in the virally-infected and in non-infected cells at different time points allows to make a distinction between the effect of the aging of cells in culture and the viral infection.](#) These data can provide useful information for potential novel gene annotations and can also be used for studying the currently available bioinformatics pipelines.

**Keywords:** SARS-CoV-2, coronavirus, long-read sequencing, full-length transcriptome, Oxford Nanopore Technologies, MinION system, direct RNA sequencing, direct cDNA sequencing

## Data Description

### Background

Severe acute respiratory syndrome coronavirus 2 (SARS-CoV-2) is a positive-sense single RNA-stranded betacoronavirus and the etiological agent of the current COVID-19 pandemic [1]. The replication and the transcription of the RNA genome are interrelated because the same enzyme, an RNA-dependent RNA polymerase (RdRP), carries out both processes [2]. First, negative-sense RNA intermediates are generated to serve as templates for the synthesis of both the genomic RNA (gRNA) and the nested set of subgenomic RNAs (sgRNAs) [3]. The gRNA and the sgRNAs have common 5' and 3'-termini since the RdRP synthesizes the positive sense RNAs from this end of the genome. Template-switching occurs during the synthesis of the negative-strand of sgRNAs, which is mediated by the transcription-regulating sequences (TRSs) in the genome body (TRS-B) and in the 5'-leader sequence (TRS-L) resulting in the fusion of leader-body sequences [4,5]. Recent studies have disclosed the transcriptomic architecture of SARS-CoV-2 and the effect of viral infection on the host gene expression [6]. It has been shown that, besides canonical TRS-dependent RNA molecules, the viral genome also codes for non-canonical, TRS-dependent and TRS-independent, transcripts, although in a relative low abundance (altogether <10%). Additionally, investigations of the effect of the viral

infection on the transcriptome of various cell types have identified several genes and gene networks [7].

Nonetheless, the kinetic studies of gene expressions used only a few timepoints for monitoring the infection [8,9], which do not provide a comprehensive picture on the temporal dynamics of viral transcriptome. Furthermore, typically a low (0.1) multiplicity of infection (MOI) was applied in the experiments, which may lead to misleading conclusions on the kinetic properties of SARS-CoV-2 transcripts, because [after the completion of the replication cycle, the virus can gradually initiate new infection cycles](#) within the non-infected cells [10]. Low-MOI-infection makes also difficult to assess the host cell response, especially in the case of the down-regulated genes. Infections are typically carried out using fresh, rapidly growing [cultured](#) cells, [however, only](#) the fresh cells (at [time point 0](#)) [are used as](#) mock-infected cells. [Nonetheless](#), gene expression profiles may undergo [alterations in](#) non-infected cells during the propagation therefore, we cannot decide whether the transcriptional changes [in infected cells are](#) due to the effect of the virus or to the time factor of [culturing \(aging of cells\)](#). This phenomenon [has practically never been tested](#) in the experiments. An additional problem is the use of short-read sequencing for profiling of the host cell reaction to the viral infection [7] because this approach has severe limitations for the detection of transcript isoforms, such as splice and length variants, and multigenic transcripts, among others [11-13].

Long-read sequencing (LRS) opened new avenues for the comprehensive analysis of the transcriptomes, for which the major reason is that these techniques are able to detect full-length RNA molecules and thereby to distinguish between transcript isoforms and transcriptional overlaps. LRS-based studies have revealed a hidden transcriptional complexity in viruses [14-17], but this approach has also been used for the analysis of the kinetic properties of viral transcriptomes [18], for the analysis [of RNA modifications \[16,19\], as well as](#) the virus-host interaction [20,21].

In this study, we applied nanopore sequencing based on direct RNA (dRNA) and direct cDNA (dcDNA) approaches for the generation of transcriptomic datasets from SARS-CoV-2 and primate host

Vero) cells. A mixed time point sample (single library from a mixture containing equal amount of total RNAs from each of the 16 time points) was used for dRNA sequencing, while we used 16 time-point samples within an interval of 1 to 96 h from both infected and non-infected host cells using MOI=5 for the infection.

Decoding the transcriptional landscape of SARS-CoV-2 virus is a fundamental step in studying its biology, genetic regulation and molecular pathogenesis. Therefore, in this data descriptor, our aim was to provide a robust, precise, reliable dataset based on LRS approaches for understanding the gene expression and genetic regulation of the causative agent of current pandemic, its effect on differential host gene expression, as well as to provide a rich resource for future functional studies.

**Table 1.**

|              | Quality    | Total<br>(infected) | Virus            | Host<br>(infected) | Unmapped<br>(infected) | Total<br>(uninfected) | Host<br>(uninfected) | Unmapped<br>(uninfected) |
|--------------|------------|---------------------|------------------|--------------------|------------------------|-----------------------|----------------------|--------------------------|
| <b>dcDNA</b> | <b>all</b> | <b>32,017,113</b>   | <b>1,527,249</b> | <b>23,703,827</b>  | <b>6,786,037</b>       | <b>29,294,533</b>     | <b>22,149,844</b>    | <b>7,144,689</b>         |
| <b>dcDNA</b> | $\geq 8$   | 23,607,200          | 1,280,395        | 21,246,856         | 1,079,949              | 20,360,096            | 19,008,016           | 1,352,080                |
| <b>dcDNA</b> | $< 8$      | 8,409,913           | 246,854          | 2,456,971          | 5,706,088              | 8,934,437             | 3,141,828            | 5,792,609                |
| <b>dRNA</b>  | <b>all</b> | <b>2,606,502</b>    | <b>281,418</b>   | <b>1,999,161</b>   | <b>325,923</b>         | -                     | -                    | -                        |
| <b>dRNA</b>  | $\geq 8$   | 1,950,595           | 236,518          | 1,658,588          | 55,489                 | -                     | -                    | -                        |
| <b>dRNA</b>  | $< 8$      | 655,907             | 44,900           | 340,573            | 270,434                | -                     | -                    | -                        |

## Methods

**Figure 1** shows the detailed workflow of the study.

### Cells

The Vero E6 (African green monkey kidney) cell line was obtained from the American Type Culture Collection (ATCC). The cells were plated at a density of  $2 \times 10^6$  cells per 75 cm<sup>2</sup> tissue culture flasks

(CELLSTAR® Greiner Bio-One GmbH, Frickenhausen, Germany) in Minimum Essential Medium Eagle culture medium (MEM) with 10% fetal bovine serum (FBS) and 2mM L-glutamine and antibiotic-antimycotic solution (all obtained from Sigma-Aldrich). Vero cells were incubated at 37°C in a humidified 5% CO<sub>2</sub> atmosphere until confluency (~8 x 10<sup>6</sup> cells) was reached. The monolayer was washed once with the serum-free MEM immediately before infection.

### **Collection, detection and isolation of the virus**

The SARS-CoV-2 virus was isolated from the human nasopharyngeal swab of the RT-PCR positive (Ct 22) 77-year-old male patient during the official COVID-19 surveillance program at the Veterinary Diagnostic Directorate of the National Food Chain Safety Office (Budapest, Hungary) with the cooperation of the Complex Medical Center (Budapest) in November 2020 at the second wave of COVID-19 pandemic in Hungary. The patient developed respiratory illness, with fever, cough, and fatigue that quickly progress to pneumonia. The patient was hospitalized, where, unfortunately, he died in a few days. In his story, he did not declare any travel abroad in the last 14 days. At the same time, he traveled relatively frequently within Hungary and had been in close contact with the people with COVID-19.

Detection of SARS-CoV-2 in pharyngeal wash samples was performed using RT-PCR amplification of SARS-CoV-2 N-gene fragments. Two hundred microliters (200 µL) of the pharyngeal washes were first processed for RNA extraction in the Thermo Scientific™ KingFisher™ Flex Purification System (Thermo Fisher Scientific, Waltham, MA USA), using the IndiMag® Pathogen Kit (QIAGEN® GmbH, Hilden, Germany). Subsequently, the detection of N-gene of SARS-CoV-2 was performed by using the 2019-nCoV-2 RUO kit (Integrated DNA Technologies, Inc., Coralville, Iowa, USA) and One-Step RT-PCR Kit (QIAGEN® GmbH) on a Rotor-Gene Q real-time PCR cycler (QIAGEN® GmbH). The amplification protocol consisted of a reverse transcription step at 50°C for 30 minutes, a denaturation step at 95°C for 15 minutes and subsequent 45 cycles at 95°C/56°C/72°C for 30/30/60

seconds, respectively. A positive result was defined as amplification of N-gene in a sample with each cycle threshold value (ct) less than 37.

For the virus isolation, 1 ml of viral transport media from the swab was mixed with 3 ml serum-free MEM culture medium supplemented with 2mM L-glutamine and antibiotic-antimycotic solution and were filtered using Ministar® 0.22µm filter (Sartorius AG, Göttingen, Germany). The filtrate was placed onto cells in a 25 cm<sup>2</sup> tissue culture flask (Corning®, Corning Inc., New York, USA) of Vero E6 cells, then were incubated at 37°C in a humidified 5% CO<sub>2</sub> chamber for 1 hour. After incubation, two and a half milliliters (2.5 ml) of serum-free MEM culture medium with 2mM L-glutamine and antibiotic-antimycotic solution was added to the tissue culture flask. The inoculated culture was grown in a humidified 37°C incubator with 5% CO<sub>2</sub>. Cells were observed daily for cytopathic effect (CPE). On day 4, an 80% CPE was evident, and the cells with supernatant were harvested. This provided the first passage virus. The virus was passaged twice at low MOI in Vero E6 cells to obtain a working stock used in the experiments. The viral titer was determined by plaque assay on Vero E6 cells. Virus stock was stored at -80°C until use.

### **Propagation of the virus**

The virus was passaged twice in Vero cells to obtain a working stock used in all experiments. Viral titer was determined by plaque assay on Vero cells. The virus was diluted into a serum-free MEM. Cells were infected with 5 ml of the SARS-CoV-2 virus with 5 plaque-forming unit (pfu)/cell [multiplicity of infection (MOI=5)], then were incubated at 4°C for 1 h. Non-infected control cultures (mock) were prepared using pure non-supplemented MEM as inoculums. Next, the virus inoculum was removed from the flasks. The monolayer was washed once with the serum-free MEM. Ten milliliters of MEM culture medium supplemented with 3% FBS, 2mM L-glutamine, and antibiotic-antimycotic solution was added to the tissue culture flasks. The cells were incubated at 37°C for 1, 2, 4, 6, 8, 10, 12, 14, 16, 18, 20, 24, 36, 48, 72 and 96 hours in a humidified 5% CO<sub>2</sub> atmosphere. Each time experiment was done in triplicate with a mock-infected control. Mock-infected cells were harvested at

the same time points as the infected cells. Following incubation, the medium was removed, and the monolayer was washed once with phosphate-buffered saline (PBS). The tissue culture plates were stored at -80°C until use. Next, the infected cells were treated by lysis buffer, then creped and placed into an Eppendorf Tubes® (Thermo Fisher Scientific Inc.).

### **RNA purification**

Total RNA was extracted from the mock-infected and from the SARS-CoV-2-infected cells at various stages of infection from 1 to 96 hours using the Macherey-Nagel's NucleoSpin RNA Kit according to the manufacturer's protocol. In brief, cells were collected by low-speed centrifugation, then 350µl lysis buffer (RA1 from the Kit), 3.5µl β-Mercapthoethanol (Sigma Aldrich) were added followed by vortexing the samples. Mixtures were loaded onto a NucleoSpin Filter and centrifuged for 1min at 11,000 x g. The filters were discarded and 350µl 70% EtOH was added to the lysate. This was loaded to the NucleoSpin RNA Column and centrifuged at 11,000 x g for 30sec. Membrane was desalted with the addition of 350µl Membrane Desalting Buffer (from the NucleoSpin Kit), then dried with a short centrifugation (11,000 x g). Residual DNA was enzymatically removed [with the usage of 95µl mixture of rDNase:rDNase reaction buffer (1:9 ratio, NucleoSpin Kit) and incubation at room temperature (RT) for 15min]. The rDNase was inactivated with the first washing step, by adding 200µl RAW2 Buffer (NucleoSpin Kit) directly onto the NucleoSpin Filter. After a quick centrifugation (30min, 11,000 x g), the filter was placed in a new tube. Six-hundred µl RAW3 Buffer (NucleoSpin Kit) was added, then spun down as before. This washing step was repeated using 250µl RAW3. Finally, the total RNA bound to the Filter was eluted in 60µl nuclease-free water (NucleoSpin Kit). Samples were quantified by Qubit 4.0 using the Qubit RNA BR Assay Kit (Invitrogen, **Supplementary Table S3A**) and then stored at -80°C until use.

### **Poly(A) selection**

Lexogen's Poly(A) RNA Selection Kit V1.5 was used to isolate polyadenylated RNAs from the total RNA samples. The protocol applies oligo(dT) beads, which capture RNAs with poly(A) stretches (most

mRNAs), but RNAs without polyadenylated 3' ends (e.g. 28S and 18S rRNAs and tRNAs) do not hybridize to the beads and therefore, they will be removed during the washing steps. The detailed protocol is as follows: the magnetic beads (part of the Lexogen Kit) was resuspended and 4µl for each RNA samples was measured. Beads were placed in a magnet, they were collected and the supernatant was discarded. Samples were resuspended in 75µl Bead Wash Buffer (Lexogen Kit) and then were placed on the magnet. Supernatant was discarded and this washing step was repeated once. Beads were resuspended in 20µl RNA Hybridization Buffer (part of the Lexogen Kit). Ten ng from the total RNA samples were diluted to 20µl UltraPure™ DNase/RNase-Free Distilled Water (Invitrogen) and then denatured at 60°C for 1min followed by holding them at 25°C. Twenty µl denatured RNA was mixed with 20µl (previously washed and resuspended) beads. The mixtures were incubated at 25°C in a shaker incubator with 1250 rpm agitation. After 20min incubation, sample-containing tubes were placed in a magnetic rack. Supernatant was discarded then the tubes were removed from the magnet. Samples were resuspended in 100µl Bead Wash Buffer (Lexogen Kit) then they were incubated for 5min at 25°C with 1250 rpm agitation. Supernatant was discarded and the washing step was repeated. After the complete removal of the supernatant, beads were resuspended in 12µl UltraPure™ DNase/RNase-Free Distilled Water. Samples were incubated at 70°C for 1min, then the tubes were placed on a magnetic rack. Supernatant, containing the poly(A)+ RNA fraction, was placed to new DNA LoBind (Eppendorf) tubes, the RNA concentration was measured using Qubit RNA HS Assay Kit (Invitrogen, **Supplementary Table S3B**), then samples were stored at -80°C.

### **ONT – direct cDNA sequencing**

For the analysis of the dynamic properties of SARS-CoV-2 RNAs and the effect of viral infection on the host cell transcriptome profile, RNA samples from different time points (1, 2, 4, 6, 8, 10, 12, 14, 16, 18, 20, 24, 36, 48, 72 and 96h p.i., **Supplementary Table S3C**) were used individually for the generation of direct cDNA libraries for nanopore sequencing. The non-amplified cDNA libraries were prepared from sixteen time-points from the mock, and from the coronavirus-infected samples, in three

biological replicates using the Direct cDNA Sequencing Kit (SQK-DCS109, ONT) and the appropriate ONT protocol. In short, first-strand cDNAs were generated from the polyA(+) RNAs using the Maxima H Minus Reverse Transcriptase (Thermo Fisher Scientific) with SSP and VN primers (supplied in the kit). The RNase Cocktail Enzyme Mix (Thermo Fisher Scientific) was used to eliminate the potential RNA contamination. Synthesis of the second cDNA strands were carried out with LongAmp Taq Master Mix (New England Biolabs). The double-stranded cDNAs were repaired (NEBNext End repair /dA-tailing Module, New England Biolabs) and adapter ligated (NEB Blunt /TA Ligase Master Mix New England Biolabs). Individual barcode sequences were added to each samples for multiplex sequencing for which the Native Barcoding (12) Kit (ONT) was used as recommended by the manufacturer. The cDNAs and the libraries were washed using AMPure XP beads (Agencourt, Beckman Coulter) after every enzymatic reaction step. The barcode labeled samples were loaded onto MinION R9.4 SpotON Flow Cells (ONT, **Table 2**).

**Table 2.**

| Sample # | Flow cell # | Sample # | Flow cell # | Sample # | Flow cell # | Sample # | Flow cell # | Barcode # | Barcode sequence          |
|----------|-------------|----------|-------------|----------|-------------|----------|-------------|-----------|---------------------------|
| 1h/A     | 1           | 16h/A    | 3           | 1h/A     | 5           | 16h/A    | 7           | BC01      | AAGAAAGTTGTCCGTGTCTTTGTG  |
| 1h/B     |             | 16h/B    |             | 1h/B     |             | 16h/B    |             | BC02      | TCGATTCCGTTTGTAGTCGTCTGT  |
| 1h/C     |             | 16h/C    |             | 1h/C     |             | 16h/C    |             | BC03      | GAGTCTTGTGTCCCAGTTACCAGG  |
| 2h/A     |             | 18h/A    |             | 2h/A     |             | 18h/A    |             | BC04      | TTCGGATTCTATCGTGTTCCTA    |
| 2h/B     |             | 18h/B    |             | 2h/B     |             | 18h/B    |             | BC05      | CTTGTCCAGGGTTTGTGTAACCTT  |
| 2h/C     |             | 18h/C    |             | 2h/C     |             | 18h/C    |             | BC06      | TTCTCGCAAAGGCAGAAAGTAGTC  |
| 4h/A     |             | 20h/A    |             | 4h/A     |             | 20h/A    |             | BC07      | GTGTTACCGTGGGAATGAATCCTT  |
| 4h/B     |             | 20h/B    |             | 4h/B     |             | 20h/B    |             | BC08      | TTCAGGGAACAAACCAAGTTACGT  |
| 4h/C     |             | 20h/C    |             | 4h/C     |             | 20h/C    |             | BC09      | AACTAGGCACAGCGAGTCTTGGTT  |
| 6h/A     |             | 24h/A    |             | 6h/A     |             | 24h/A    |             | BC10      | AAGCGTTGAAACCTTTGTCTCTC   |
| 6h/B     |             | 24h/B    |             | 6h/B     |             | 24h/B    |             | BC11      | GTTTCATCTATCGGAGGGAATGGA  |
| 6h/C     |             | 24h/C    |             | 6h/C     |             | 24h/C    |             | BC12      | CAGGTAGAAAAGAAGCAGAATCGGA |
| 8h/A     | 2           | 36h/A    | 4           | 8h/A     | 6           | 36h/A    | 8           | BC13      | AGAACGACTTCCATACTCGTGTGA  |
| 8h/B     |             | 36h/B    |             | 8h/B     |             | 36h/B    |             | BC14      | AACGAGTCTCTTGGGACCCATAGA  |
| 8h/C     |             | 36h/C    |             | 8h/C     |             | 36h/C    |             | BC15      | AGGTCTACCTCGCTAACACCACTG  |
| 10h/A    |             | 48h/A    |             | 10h/A    |             | 48h/A    |             | BC16      | CGTCAACTGACAGTGGTTCGTACT  |
| 10h/B    |             | 48h/B    |             | 10h/B    |             | 48h/B    |             | BC17      | ACCCTCCAGGAAAGTACCTCTGAT  |
| 10h/C    |             | 48h/C    |             | 10h/C    |             | 48h/C    |             | BC18      | CCAAACCAACAACCTAGATAGGC   |
| 12h/A    |             | 72h/A    |             | 12h/A    |             | 72h/A    |             | BC19      | GTTCTCGTGCAGTGTCAAGAGAT   |
| 12h/B    |             | 72h/B    |             | 12h/B    |             | 72h/B    |             | BC20      | TTGCGTCTGTTACGAGAACTCAT   |
| 12h/C    |             | 72h/C    |             | 12h/C    |             | 72h/C    |             | BC21      | GAGCCTCTCATTGTCCGTTCTCTA  |
| 14h/A    |             | 96h/A    |             | 14h/A    |             | 96h/A    |             | BC22      | ACCACTGCCATGTATCAAAGTACG  |
| 14h/B    |             | 96h/B    |             | 14h/B    |             | 96h/B    |             | BC23      | CTTACTACCCAGTGAACCTCCTCG  |
| 14h/C    |             | 96h/C    |             | 14h/C    |             | 96h/C    |             | BC24      | GCATAGTTCTGCATGATGGGTTAG  |

**ONT – direct RNA sequencing**



ONT's Direct RNA sequencing (SQK-RNA002; Version: DRS\_9080\_v2\_revO\_14Aug2019, Last update: 10/06/2021) was used to sequence the native RNA strands from a mixture of polyA(+) RNA fractions (**Supplementary Table S3D**). Five-hundred ng RNA in 9µl nuclease-free water was mixed with 3µl NEBNext Quick Ligation Reaction Buffer (New England BioLabs), 0.5µl RNA CS (ONT Kit), 1µl RT Adapter (110nM; ONT Kit) and 1.5µl T4 DNA Ligase (2M U/ml New England BioLabs). The ligation reaction was carried out for 10min at RT. The synthesis of the first strand cDNA was conducted using SuperScript III Reverse Transcriptase (Life Technologies), as described in the Direct RNA sequencing (DRS) protocol (ONT). In short, a 50 min incubation at 50°C was followed by the inactivation of the enzyme at 70°C for 10 min. Sequencing adapters from the DRS kit were ligated to the cDNA with the T4 DNA ligase enzyme and NEBNext Quick Ligation Reaction Buffer (New England BioLabs). Ligation was carried out at RT for 10 min. The sample was washed using AMPure XP beads (Agencourt, Beckman Coulter) after every enzymatic reaction. Libraries were sequenced on an R9.4 SpotON Flow Cell.

### **Technical Validation**

**RNA** The Qubit RNA BR Assay Kit (Invitrogen, Carlsbad, CA, United States) was used to check the amount of total RNA. Qubit RNA HS Assay Kit (Invitrogen, Carlsbad, CA, United States) was used to measure the quantity of the poly(A)+ RNA fractions. The final concentrations of the RNA samples were determined by Qubit® 4.

**cDNA** The concentrations of the cDNA samples and sequencing ready libraries were measured using the Qubit dsDNA HS Assay Kit (Invitrogen, Carlsbad, CA, United States). The quality of RNA was assessed using the Agilent 2200 TapeStation System. RIN scores  $\geq 9.6$  were used for sequencing (**Figure 1D**).

The cDNAs and the sequencing-ready cDNA libraries were washed using AMPure XP beads (Agencourt, Beckman Coulter) after every enzymatic reaction. The samples for dRNA sequencing were treated with RNAClean XP beads.

Three biological replicates were used for each of the 16 time points. To monitor the effect of SARS-CoV-2 infection on the gene expression of the host cells, mock-infected cells were harvested at the same time-points, as the virally-infected cells.

## Data analysis

The MinION raw data was basecalled using ONT Guppy basecalling software version 5.0.11. using `--qscore_filtering`: reads with a Q-score of 8 or greater were termed as *'passed'* and those below were termed as *'failed'*. The VirStrain [22] tool was used on the *'passed'* reads to identify the closest SARS-CoV-2 strains to our isolate (**Supplementary Figure S1** and **Supplementary Info S1**). The resulting most likely genome (NCBI nucleotide accession: MT560672.1) was used as reference for the mapping of the reads. The infected samples reads were mapped to the host (*Chlorocebus\_sabeus* 1.1) genome (GenBank assembly accession: GCA\_000409795.2) as well, while the mock (uninfected) samples were mapped to the host genome only. The mappings were carried out with the *minimap2* aligner [23], using the following parameters: *minimap2 -ax splice -Y -C5*. The *view* command from the SamTools package [24] was used on the resulting *'sam'* files to generate binary alignment (*'bam'*) files, which were subsequently sorted and indexed, using the *sort* and *index* commands, respectively; and finally the *view* command was used again to separate the data into viral-mapped, host-mapped and unmapped *'bam'* files. Our in-house developed python script *'readstats.py'* were used to generate the descriptive statistics of reads and the alignments (<https://github.com/moldovannorbert/seqtools>). The output of *readstat* script, containing the mapping statistics was imported into R. Subsequently the median, 25% percentile and 75% percentile values of the mapped read lengths were calculated and visualized using *ggplot2* [25] for both the viral and host reads (**Figure 5**). In the case of the infected samples, the ratios of the reads mapped to the viral and host genome were also visualized using *ggplot2* (**Supplementary Figure S3**).

To distinguish RNAs originating from the viral genome (gRNA) from the sub-genomic transcripts (sgRNA), we further processed the reads by re-mapping the reads initially mapped to the original

Wuhan genome isolate (NC\_145512.2) with *minimap2 -ax splice -Y -C5 --MD -un -g 30000 -G 30000 -O2,24 -E1,0 -C0 -z 400,200 --no-end-flt -F 40000 --secondary=no --splice-flank=no --max-chain-skip=40 --for-only*. The alignments were subsequently imported into *R* and processed via an in-house developed script, utilizing packages of the tidyverse [26], RSamtools [27], GenomicAlignments [28], tidygenomics (<https://const-ae.github.io/tidygenomics>) and dplyr [29]. Sub-genomic RNAs were defined as RNAs that overlap with either sub-genomic ORF and have a template switch, connecting this mapped region with the 5'-leader part of the genome (in the 55-85 position of the reference genome). Genomic RNAs were defined as those RNAs that overlap with ORF1ab (with at least 10 nt-s), and are not in the sub-genomic category. All other reads were categorized as 'unclassified' RNAs. The ratio of the sub-genomic/genomic categories in each sample was visualized in a scatterplot with a fitted loess function (**Figure 2**).

From the imported alignments, genome coverage was calculated and subsequently visualized in a log10 scale (**Figure 4**) using ggplot2 [25], the ORF annotations was generated with gggenes (<https://github.com/wilcox/gggenes>).

The mapped parts of the RNAs were summed to calculate transcript lengths. From this data, violin plots were generated for the genomic, sub-genomic and unclassified RNAs as well (**Supplementary Figure S1**).

The scripts that were used to analyze the alignments and to classify them as genomic or sub-genomic origin, is available as a complete workflow, that is, from downloading the reads to generate the figures, at [https://github.com/Balays/SARS-CoV2\\_ONT\\_data](https://github.com/Balays/SARS-CoV2_ONT_data). The R-scripts can be used with other *bam* files, reference genomes and/or parameters, as well to import, filter and analyze alignments or to dereplicate them into transcripts.

The SARS-CoV-2 genome was assembled with the shasta program (v.0.9.0) [30] using all viral reads longer than 20,000 bps (*shasta --Reads.minReadLength 20000 --config Nanopore-Oct2021*; otherwise default parameters). The obtained draft assembly (SARS-CoV-2\_Hun-1\_GenomeDraft\_v1) was

analyzed for mutations and characterized phylogenetically with the Nextstrain [31] program, along with the genome from the VirStrain result (**Figure 3, Supplementary Figure S2, Supplementary Info S1, S2, S3 and Supplementary Table S4**). The draft assembly was submitted to NCBI (sequence accession: OM812693.1).

Altogether, we generated almost 64 million long-reads from which more than 1.8 million reads mapped to the SARS-CoV-2 and almost 48 million to the host reference genome (**Table 1**). Time course changes in the virus to host ratio is depicted in **Supplementary Figure S3**. The obtained read count resulted in a very high coverage across the viral genome (**Figure 4**). Detailed data on the read counts, quality of reads including read lengths (**Figure 5**), insertions, deletions, as well as mismatches are summarized in **Supplementary Table S1A, B and S2A B**.

## Data summary

The raw sequencing reads were mapped to both the SARS-CoV-2 and to the host reference genomes. In this study, we generated full-length transcripts of SARS-CoV-2 and the Vero cells, yielding about 54,62 Gbs of mapped sequencing data. Sequencing of the time-course experiment (dcDNA sequencing) yielded 1,516,913 and 21,246,856 high quality (Q-score  $\geq 8$ ) reads aligned to the viral and the host genome, respectively (**Supplementary Table S1 and S2**), while the dRNA sequencing generated 236,518 viral and 1,658,588 *C. sabaueus* reads. The ratio of viral transcripts is less than 4% at the first twelve examined time points (1-24h p.i.), and the relative viral read count is the highest at 36h pi (**Supplementary Table S1, Supplementary Figure S4, S5**). The ratio between the virus-host reads is 14% in the mixed time point sample (dRNA sequencing). The exact ratio is dependent on the stage of the viral life cycle at the examination period.

The average read lengths aligning to the SARS-CoV-2 genome was 1,636 bps (it varies from 1,482 bps to 2,300 bps between the samples) at the time-course dcDNA experiment (**Supplementary Table S1**). The dRNA-seq resulted in 1,652 bp read length in an average.

In accordance with the previously published data [32], our results also show that insertions are the least frequent errors in ONT MinION sequencing (**Supplementary Table S1**). In agreement with others' results [33], our dRNA reads have higher deletion and mismatch error rate than the dcDNA-Seq samples. In sum, the absolute error rate of ONT MinION platform is relative high, which is compensated by the high read coverage. It is important to note that read quality is not essential for transcriptome analysis if well-annotated reference genomes are available.

Our transcriptomic survey yielded a very high read-coverage across the viral genome (**Figure 3**, **Supplementary Figure S4**, detailed information, including quality information are available in **Supplementary Table S1**). In our experiment, the ratio of these two categories started with about 5-9% in the 1 and 2 hpi samples, and after a more or less steady growth, peaked at 18-20 hpi, with about 25-26%, which indicates an active viral infection phase. The ratio then declined and eventually dropped to roughly the same ratio as in the beginning (4-10%) at 72 and 96 hpi (**Figure 2**).

The mapped transcript lengths (without gaps) show that the genomic RNAs tend to be longer than the sub-genomic RNAs, both in the cDNA and in the dRNA sequencing libraries (**Supplementary Figure S1**). The limitation of LRS approaches is their preference for the short sequences, which leads to the underrepresentation of long RNA molecules compared to the short ones. Despite this shortcoming, these techniques can be used for quantitative analysis by e.g. comparing the amounts of the same RNA molecules at distinct time points of infection.

The genome sequencing reads were used to build the assembled sequence (first Hungarian complete SARS-CoV-2 genome sequence, unpublished). After some testing, we were able to assemble a draft genome with the shasta program, using the 109 reads that were longer than 20,000 bps into one contig of length 29,782. This genome draft has an overall of 30 mutations (compared to the original Wuhan isolate), and consequently 3 frame-shifts. Nevertheless, the Nextstrains results showed that our isolate (SARS-CoV-2\_Hun-1\_GenomeDraft\_v1) was placed very close to MT560672.1 genome from the VirStrain output, both isolates were classified into the clade 20A (EU1) of the virus (**Figure 2**,

**Supplementary Info S1, S2 and S3, Supplementary Table S4**). This shows the overall robustness of both the *de novo* assembly and the VirStraind method.

## Conclusions and Reuse Potential

The datasets provided in this report allow a time-course look at the full-length transcriptome of SARS-CoV-2 over a 96 h period of infection which provides a deeper understanding of the molecular biology of the virus (e.g. transcriptional analysis of subgenomic region, analysis of the dynamics of viral replication, examination of the potential interactions between transcription and replication, as well as to study the potential transcript isoforms of the virus). Our data eliminate the limitations of other SARS-CoV-2 transcriptomic experiments. First, we used a high plaque-forming unit per cell (MOI=5 pfu/cell) for the infection (other studies typically apply 0.1 pfu), therefore the large majority of cells in the culture became infected, and hence the possibility of a second round of infection is excluded. Additionally, due to the high temporal resolution, our data is also useful to precisely measure the alteration of the gene expression of both the virus and the host cell. Third, we provide mock-infected cells, which were harvested in the same time-points, as the virally-infected cells, which allows the identification of gene-network alterations due to the aging of the cell culture and to analyze the temporal changes of gene expression patterns during the cultivation. Virus-host interactions can also be examined. Furthermore, due to the very long reads and high coverage across the viral genome, assembly of this Hungarian isolate and the analysis of potential genome editing events can be achieved from the data. Moreover, the applied direct RNA and direct cDNA sequencing approaches provides independent methods for the validation of novel transcripts. Due to the high coverage, this dataset can also be used for the reconstruction of the viral genome. Finally, this dataset can also be used from various bioinformatics aspects: e.g. the data can be further analyzed or other bioinformatic programs (NanoPack [34], SQANTI3 [35] (<https://github.com/ConesaLab/SQANTI3>), Ira [36], LoRTIA [37] (<https://github.com/zsolt-balazs/LoRTIA>) or any other programs for LRS data analysis listed in

LONG-READ-TOOLS [38, 39]) can be tested on these data. Potential template switching artefacts can be tested using the transcript annotator developed by our group [37].

The uploaded binary alignment (BAM) files contain reads already mapped to the SARS-CoV-2 reference genome (MT560672.1), as well as to the host genome (GCA\_000409795.2) using Minimap2.

The uploaded reads contain terminal poly(A) sequences as well as the 5' and 3' adapters, which can be used to determine the orientations of the reads.

### **Availability of source code**

Seqtools: <https://github.com/moldovannorb/seqtools>

deepTools: <https://github.com/deeptools/deepTools>

GATK: <https://gatk.broadinstitute.org/>

guppy: <https://github.com/nanoporetech/pyguppyclient>

minimap2: <https://github.com/lh3/minimap2>

tidygenomics: <https://const-ae.github.io/tidygenomics>

SamTools: <https://github.com/SAMTools/>

VirStrain: <https://github.com/liaohherui/VirStrain>

NextStrain: <https://clades.nextstrain.org/>

### **Availability of Supporting Data**

All data generated in this study including the unmapped reads as well as reads which do not match our strict criteria (Q-score below 8) can be found in European Nucleotide Archive under the accession number: PRJEB51064. Supplementary Figures, Tables and Info files are available at Figshare: <https://doi.org/10.6084/m9.figshare.19230030>. Data records and supporting information (e.g. sample IDs, experimental steps performed on each, etc.) are summarized in **Supplementary Table S1 and S2**.

## **Competing interests**

The authors declare that there are no conflicts of interest.

## **Funding**

National Research, Development and Innovation Office, Researcher-initiated research projects, K 128247, Z Boldogkői;

National Research, Development and Innovation Office, Research projects initiated by young researchers, FK 128252, D Tombác;

University of Szeged, Open Access Fund, 5654, Z Boldogkői;

## **Author Contributions**

DT analyzed the data, took part in Nanopore sequencing, drafted the manuscript and coordinated the project. ÁD performed Nanopore sequencing and RNA purification. GG conducted bioinformatics analysis. ZC took part in RNA isolation and sequencing. IP participated in RNA isolation and analysis. BK carried out bioinformatics. ÁH participated in sequencing and data analysis. IJ isolated and propagated the virus. BD propagated the virus and the host cells and took part in drafting the manuscript. ZB conceived and designed the experiments, supervised the project and wrote the manuscript. All authors read and approved the final paper.

## **Ethical approval**

The ethical approval for the study was obtained from the institutional review board and research ethic committee of the Complex Medical Center, Budapest, Hungary, under the project accession number: CMX-U2012. These studies were performed under appropriate containment, given classifications of SARS-CoV-2 at the time of the study.

## **Abbreviations**

ATCC - American Type Culture Collection



dcDNA - direct cDNA (= non-amplified cDNA)

dRNA - direct RNA

FBS - fetal bovine serum

LRS - Long-read sequencing

MEM - Minimum Essential Medium Eagle

MOI - multiplicity of infection

PBS - phosphate-buffered saline

pfu – plaque-forming unit

pi - post-infection

RdRP - RNA-dependent RNA polymerase

SARS-CoV-2 - Severe acute respiratory syndrome coronavirus 2

sgRNA - subgenomic RNA

TRS - transcription-regulating sequence

Vero E6 - African green monkey kidney

## References

1. Zhou P, Yang X-L, Wang X-G, Hu B, Zhang L, Zhang W, et al. A pneumonia outbreak associated with a new coronavirus of probable bat origin. *Nature* 2020;579:270-273. doi:10.1038/s41586-020-2012-7
2. Woo PC, Huang Y, Lau SK, Yuen KY. Coronavirus genomics and bioinformatics analysis. *Viruses* 2010;2:1804–20. doi:10.3390/v2081803.

3. Sola I, Moreno JL, Zúñiga S, Alonso S, Enjuanes L. Role of nucleotides immediately flanking the transcription-regulating sequence core in coronavirus subgenomic mRNA synthesis. *J. Virol.* 2005;79:2506-2516. doi:10.1128/JVI.79.4.2506-2516.2005
4. Hussain S, Pan J, Chen Y, Yang Y, Xu J, Peng Y, et al. Identification of novel subgenomic RNAs and noncanonical transcription initiation signals of severe acute respiratory syndrome coronavirus. *J. Virol.* 2005;79:5288-5295. doi:10.1128/JVI.79.9.5288-5295.2005
5. Sola I, Almazán F, Zúñiga S, Enjuanes L. Continuous and Discontinuous RNA Synthesis in Coronaviruses. *Annu. Rev. Virol.* 2015;2:265-288. doi: 10.1146/annurev-virology-100114-055218
6. Kim D, Lee J-Y, Yang J-S, Kim JW, Kim VN, Chang H. The Architecture of SARS-CoV-2 Transcriptome. *Cell* 2020;181:914-921.e10. doi:10.1016/j.cell.2020.04.011
7. Sun J, Ye F, Wu A, Yang R, Pan M, Sheng J, et al. Comparative Transcriptome Analysis Reveals the Intensive Early Stage Responses of Host Cells to SARS-CoV-2 Infection. *Front. Microbiol.* 2020;11:593857. doi:10.3389/fmicb.2020.593857
8. Chang JJ-Y, Rawlinson D, Pitt ME, Taiaroa G, Gleeson J, Zhou C, et al. Transcriptional and epi-transcriptional dynamics of SARS-CoV-2 during cellular infection. *Cell Rep.* 2021;35:109108. doi:10.1016/j.celrep.2021.109108
9. Wang D, Jiang A, Feng J, Li G, Guo D, Sajid M, et al. The SARS-CoV-2 subgenome landscape and its novel regulatory features. *Mol. Cell* 2021;81:2135–2147. doi:10.1016/j.molcel.2021.02.036
10. Beyleveld G, White KM, Ayllon J, Shaw ML. New-generation screening assays for the detection of anti-influenza compounds targeting viral and host functions. *Antiviral Res.* 2013;100:120-32. doi:10.1016/j.antiviral.2013.07.018
11. Steijger T, Abril JF, Engström PG, Kokocinski F, The RGASP Consortium, Hubbard TJ, et al. Assessment of transcript reconstruction methods for RNA-seq. *Nat. Methods* 2013;10:1177–1184. doi:10.1038/nmeth.2714

12. Tombácz D, Csabai Z, Oláh P, Balázs Z, Likó I, Zsigmond L, et al. Full-length isoform sequencing reveals novel transcripts and substantial transcriptional overlaps in a herpesvirus. *Plos One* 2016;11:e0162868. doi:10.1371/journal.pone.0162868
13. Prazsák I, Moldován N, Balázs Z, Tombácz D, Megyeri K, Szűcs A, et al. Long-read Sequencing Uncovers a Complex Transcriptome Topology in Varicella Zoster Virus. *BMC Genomics* 2018;19:873. doi:10.1186/s12864-018-5267-8
14. Boldogkői Z, Moldován N, Balázs Z, Snyder M, Tombácz D. Long-read sequencing – a powerful tool in viral transcriptome research. *Trends Microbiol.* 2019;27:578-592. doi:10.1016/j.tim.2019.01.010
15. Tombácz D, Torma G, Gulyás G, Moldován N, Snyder M, Boldogkői Z. Meta-analytic Approach for Transcriptome Profiling of Herpes Simplex Virus Type 1. *Sci. Data*, 2020;7: 223. doi:10.1038/s41597-020-0558-8
16. Viehweger A, Krautwurst S, Lamkiewicz K, Madhugiri R, Ziebuhr J, Hölzer M, et al. Direct RNA nanopore sequencing of full-length coronavirus genomes provides novel insights into structural variants and enables modification analysis. *Genome Res.* 2019;29:1545-1554. doi:10.1101/gr.247064.118
17. Tairaoa G, Rawlinson D, Featherstone L, Pitt M, Caly L, Druce J, et al. Direct RNA sequencing and early evolution of SARS-CoV-2. *bioRxiv* 2020:976167; doi:10.1101/2020.03.05.976167
18. Tombácz D, Balázs Z, Csabai Z, Moldován N, Szűcs A, Sharon D, et al. Characterization of the Dynamic Transcriptome of a Herpesvirus with Long-read Single Molecule Real-Time Sequencing. *Sci. Rep.* 2017;7:43751. doi:10.1038/srep43751
19. Miladi M, Fuchs J, Maier W, Weigang S, i Pedrosa ND, Weiss L, et al. The landscape of SARS-CoV-2 RNA modifications. *bioRxiv* 2020:204362; doi:10.1101/2020.07.18.204362

20. Maróti Z, Tombácz D, Prazsák I, Moldován N, Csabai Z, Torma G, et al. Time-course Transcriptome Analysis of Host Cell Response to Poxvirus Infection Using a Dual Long-read Sequencing Approach. *BMC Res. Notes* 2021;14:239. doi:10.1186/s13104-021-05657-x
21. Maróti Z, Tombácz D, Moldován N, Torma G, Jefferson VA, Csabai Z, et al. Long-read Time-course Profiling of the Host Cell Response to Herpesvirus Infection Using Nanopore and Synthetic Long-Read Transcriptome Sequencing. *Sci. Rep.* 2021;11:14219. doi: 10.1038/s41598-021-93142-7
22. Liao H, Cai D, Sun Y. VirStrain: a strain identification tool for RNA viruses. *Genome Biol.* 2022;23:38. doi:10.1186/s13059-022-02609-x
23. Li H. Minimap2: pairwise alignment for nucleotide sequences. *Bioinformatics* 2018;34:3094–3100. doi:10.1093/bioinformatics/bty191
24. Li H, Handsaker B, Wysoker A, Fennell T, Ruan J, Homer N, et al. The Sequence Alignment/Map format and SAMtools. *Bioinformatics* 2009;25:2078-9. doi:10.1093/bioinformatics/btp352
25. Wickham H. ggplot2: Elegant Graphics for Data Analysis. 2nd ed. New York: Springer-Verlag; 2016.
26. Wickham et al., (2019). Welcome to the tidyverse. *Journal of Open Source Software*, 4(43), 1686, <https://doi.org/10.21105/joss.01686>
27. Morgan M, Pagès H, Obenchain V, Hayden N (2022). Rsamtools: Binary alignment (BAM), FASTA, variant call (BCF), and tabix file import. R package version 2.12.0, <https://bioconductor.org/packages/Rsamtools>
28. Lawrence M, Huber W, Pagès H, Aboyoun P, Carlson M, Gentleman R, Morgan M, Carey V (2013). “Software for Computing and Annotating Genomic Ranges.” *PLoS Computational Biology*, 9. doi:10.1371/journal.pcbi.1003118, <http://www.ploscompbiol.org/article/info%3Adoi%2F10.1371%2Fjournal.pcbi.1003118>

29. Wickham H, François R, Henry L and Müller K (2022). *dplyr: A Grammar of Data Manipulation*. R package version 1.0.9. <https://CRAN.R-project.org/package=dplyr>
30. Shafin K, Pesout T, Lorig-Roach R, Haukness M, Olsen HE, Bosworth C, et al. Nanopore sequencing and the Shasta toolkit enable efficient de novo assembly of eleven human genomes. *Nat Biotechnol.* 2020;38:1044–1053. doi:10.1038/s41587-020-0503-6
31. Aksamentov I, Roemer C., Hodcroft E. B., Neher R. A. Nextclade: clade assignment, mutation calling and quality control for viral genomes. *J. Open Source Softw.*, 2021;6:3773. doi:10.21105/joss.037731
32. Weirather JL, de Cesare M, Wang Y, Piazza P, Sebastiano V, Wang X-J, et al. Comprehensive comparison of Pacific Biosciences and Oxford Nanopore Technologies and their applications to transcriptome analysis. *F1000Res.* 2017;6:100. doi:10.12688/f1000research.10571.2
33. Garalde DR, Snell EA, Jachimowicz D, Sipos B, Lloyd JH, Bruce M, et al. Highly parallel direct RNA sequencing on an array of nanopores. *Nat. Methods.* 2018;15:201–6. doi:10.1038/nmeth.4577
34. De Coster W, D’Hert S, Schultz DT, Cruts M, Van Broeckhoven C. NanoPack: visualizing and processing long-read sequencing data. *Bioinformatics* 2018;34:2666–2669. doi:10.1093/bioinformatics/bty149
35. Tardaguila M, de la Fuente L, Marti C, Pereira C, Pardo-Palacios FJ, del Risco H, et al. SQANTI: extensive characterization of long-read transcript sequences for quality control in full-length transcriptome identification and quantification. *Genome Res.* 2018;28:396-411. doi:10.1101/gr.222976.117
36. Ren J, Chaisson MJP. Ira: A long read aligner for sequences and contigs. *PLoS Comput. Biol.* 2021;17:e1009078. doi:10.1371/journal.pcbi.1009078

37. Balázs Z, Tombácz D, Csabai Z, Moldován N, Snyder, Boldogkői Z. Template-switching artifacts resemble alternative polyadenylation. *BMC Genomics* 2019;20:824. doi:10.1186/s12864-019-6199-7
38. Amarasinghe SL, Ritchie ME, Gouil Q. long-read-tools.org: an interactive catalogue of analysis methods for long-read sequencing data. *GigaSci.* 2021;10:giab003. doi:10.1093/gigascience/giab003
39. Amarasinghe SL, Su S, Dong X, Zappia L, Ritchie ME, Gouil Q. Opportunities and challenges in long-read sequencing data analysis. *Genome Biol.* 2020;21:30. doi:10.1186/s13059-020-1935-5

## Legend to Figures

**Figure 1.** Schematic representation of the workflow applied in this project. **A.** Isolation and detection of a Hungarian isolate of SARS-CoV-2 virus. The sample was collected from human nasopharyngeal swab. The SARS-CoV-2 infection was validated by RT-PCR using the RNA extracted from the sample. The virus was isolated from the sample and was maintained on Vero cells. **B.** Experimental workflow of the study. Vero cells were infected with SARS-CoV-2 and the cells were incubated at 37°C for 1, 2, 4, 6, 8, 10, 12, 14, 16, 18, 20, 24, 36, 48, 72 and 96 hours post-infection. Uninfected control cells were also propagated. Each time point experiment was carried out in three biological replicates. RNAs were purified from the samples, which was followed by the preparation of libraries and then sequencing using direct cDNA and direct RNA methods. Altogether, nine MinION flow cells (ONT) were used for this study. **C.** Bioinformatics workflow. The ONT's Guppy basecaller was used to identify the base sequence of the obtained reads, then they were aligned to the viral and host reference genomes by using the minimap2 mapper. Statistical data were generated by various tools (e.g.: <https://github.com/moldovannorberr/seqtools>, custom R-workflow [https://github.com/Balays/SARS-CoV2\\_ONT\\_data](https://github.com/Balays/SARS-CoV2_ONT_data) ). **D.** Quality of RNA samples were detected with a TapeStation 2200 system with RNA ScreenTape. TapeStation gel image shows that intact, high quality RNAs were isolated from the

samples and used for sequencing. The image shows the following samples: A1: marker; B1: 8h pi sample C; 12h pi sample A; 16h pi sample A; 18h pi sample B, 20h pi sample C; 36h pi sample A; 48h pi sample A; 96h pi sample B

**Figure 2.** Ratio of the sgRNAs to the gRNAs across the viral infection cycle in the dcDNA samples. The fitted loess function with 95% confidence intervals is shown in blue and gray, respectively.

**Figure 3.** Phylogenetic tree displays the sequenced SARS-CoV-2 strains, according to the designated clades of the virus. Our isolate is colored as red and a red arrow shows the position of our own isolate documented in the current study (OM812693.1). The position of the genome which was used as reference for aligning the reads (MT560672.1) is also indicated by a red arrow. The tree was generated by the Nextstrain pipeline. All variants are colored by their assigned clade, according to the nomenclature.

**Figure 4.** Whole genome coverage plot using high-quality (Q-score  $\geq 8$ ) reads which aligned to the SARS-CoV-2 genome used as references for this study. Annotated protein-coding genes are shown at the bottom track. Direction of arrows depicts the coding strand.

**Figure 5.** Scatterplot of mean read lengths of the sequencing data derived from infected and uninfected samples, with 25% and 75% percentiles and a fitted loess function. **A.** Length of reads aligned to the viral **B.** and to the host genome. **C.** Read-length distribution of mock-infected samples mapped to the host genome.

## Tables

**Table 1.** Summary data of the obtained read counts from dcDNA and dRNA sequencings. Low quality (failed) reads (Q-score  $< 8$ ) were filtered out from the passed reads (Q-score  $\geq 8$ ) by the MinKNOWs (Guppy, ONT) software.

**Table 2.** List of the sequences of barcodes used for multiplex sequencing. This table also contains the information about the barcoded samples loaded on the same flow cell. A, B, and C represent the biological replicates.

## Additional Files

**Supplementary Table S1.** Summary statistics of the obtained reads from the infected samples. **A.** High quality reads, (Q-score  $\geq 8$ ). **B.** Low quality reads, (Q-score  $< 8$ ).

**Supplementary Table S2.** Summary statistics of the obtained reads from the mock-infected samples. **A.** High quality reads, (Q-score  $\geq 8$ ). **B.** Low quality reads, (Q-score  $< 8$ ).

**Supplementary Table S3.** Detailed information about the concentration of RNA and cDNA samples used for library preparation and sequencing. **A.** Concentration of RNA samples. Concentration of SARS-CoV-2 infected and mock-infected RNAs were measured with Qubit 4.0. The concentrations are in ng/ $\mu$ l. A, B and C represents the three biological replicates. **B.** Summary table of the poly(A)+ RNA concentrations. Concentrations of polyadenylated RNAs: from SARS-CoV-2 infected cells and from mock-infected cells in ng/ $\mu$ l. A, B and C represents the three biological replicates. **C.** The volume of polyA(+) RNA samples (100 ng) used for cDNA generation. A, B and C represents the three biological replicates. **D.** The amount ( $\mu$ l) of RNAs used for preparing a mixture for dRNA sequencing. Agencourt Ampure XP bead was used to get a higher concentration for the mixture (500 ng RNA in 9 $\mu$ l).

**Supplementary Table S4.** Result of nextclade analysis.

**Supplementary Figure S1.** [Violin plot of mapped region length for genomic, sub-genomic and unclassified viral RNAs.](#)

**Supplementary Figure S2.** VirStrain report.

**Supplementary Figure S3.** [Illustration of the ratio between SARS-CoV-2 – host cell read counts throughout the experimental period. The viral read count was divided by the host read count for each](#)



replicate (group). The mean and standard deviations were also calculated and connected with a straight line.

**Supplementary Figure S4.** Line graph showing the virus and host read counts.

**Supplementary Figure S5.** Polar plot representation of sequencing coverages at the examined time points after viral infection (log<sub>10</sub> scale).

**Supplementary Info S1.** Output files of VirStrain.

**Supplementary Info S2.** Nexstrain phylogenetic tree

**Supplementary Info S3.** Output files of nextclade.

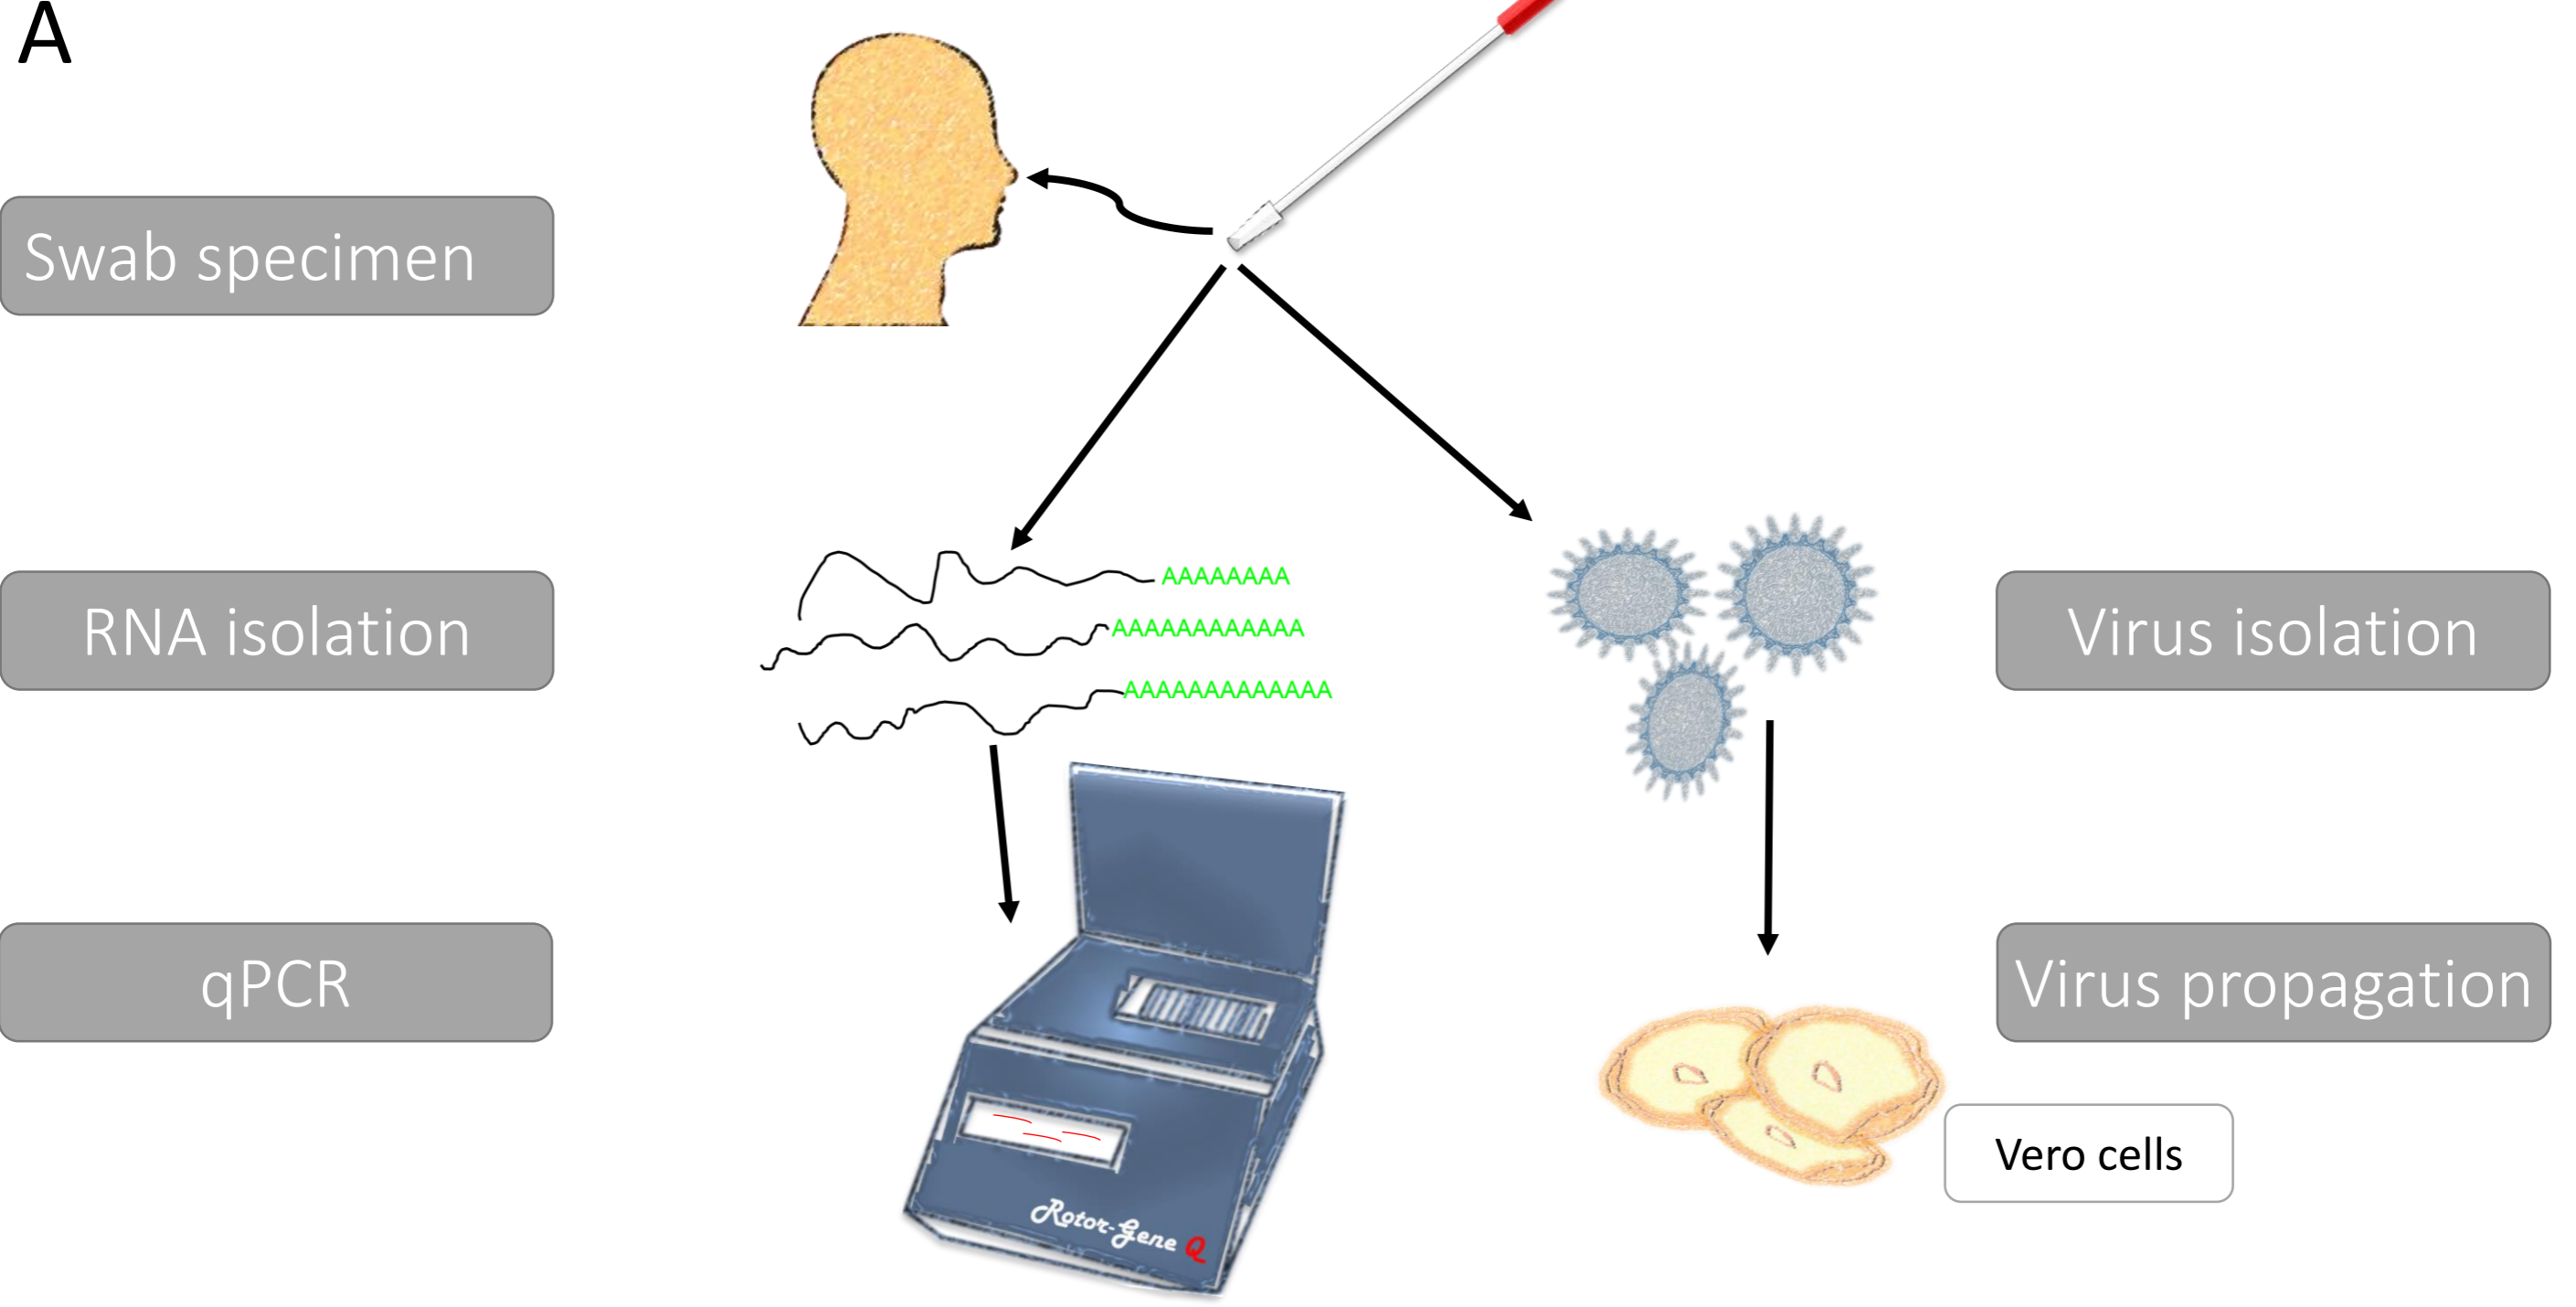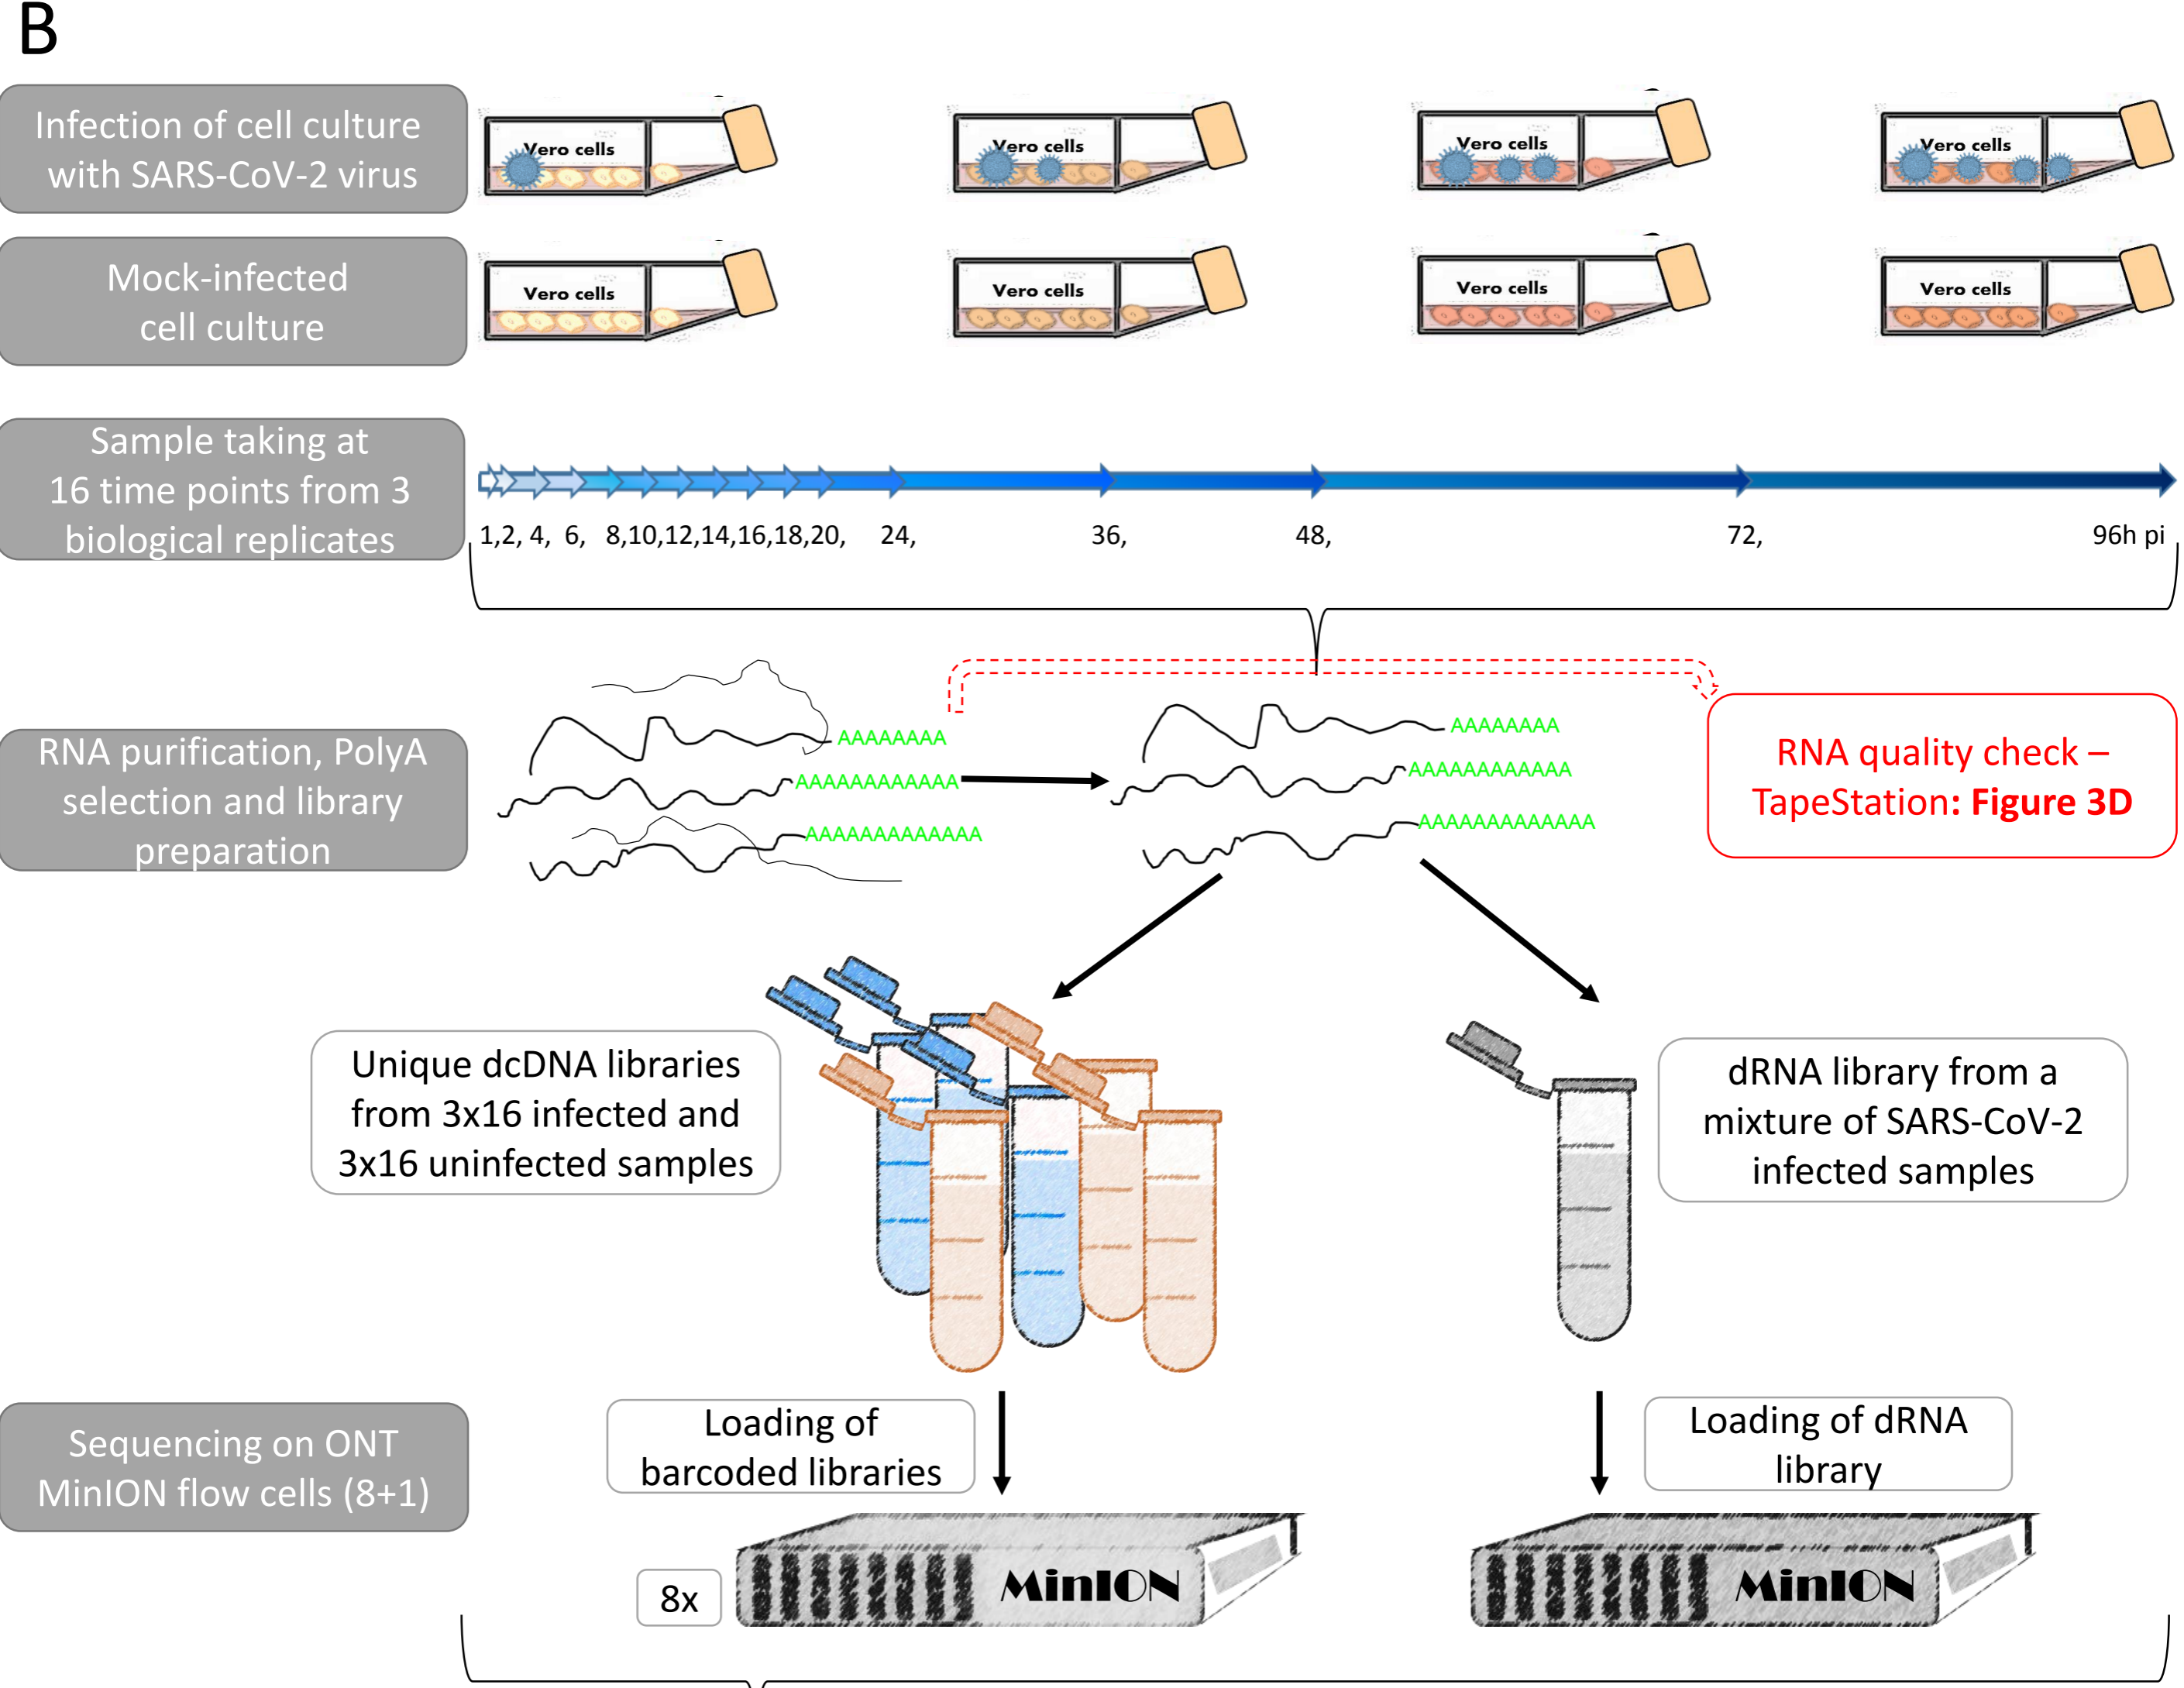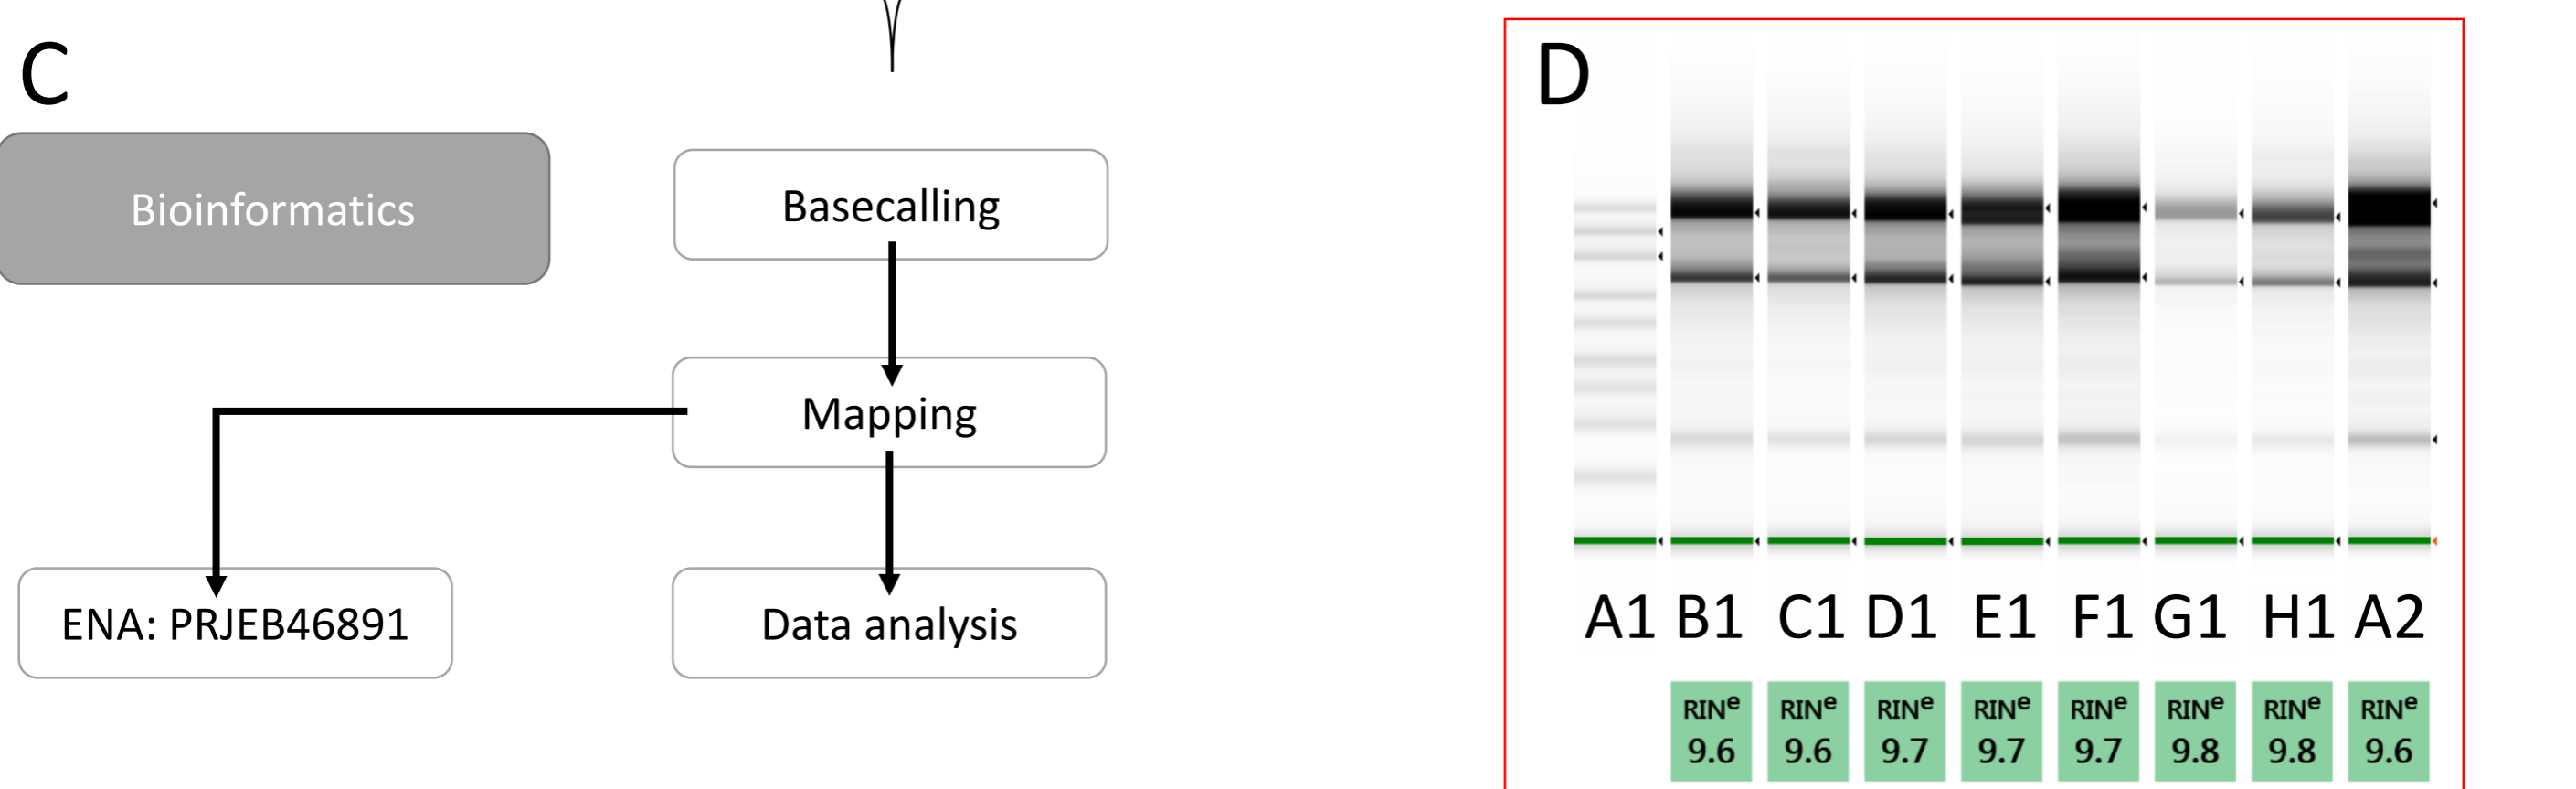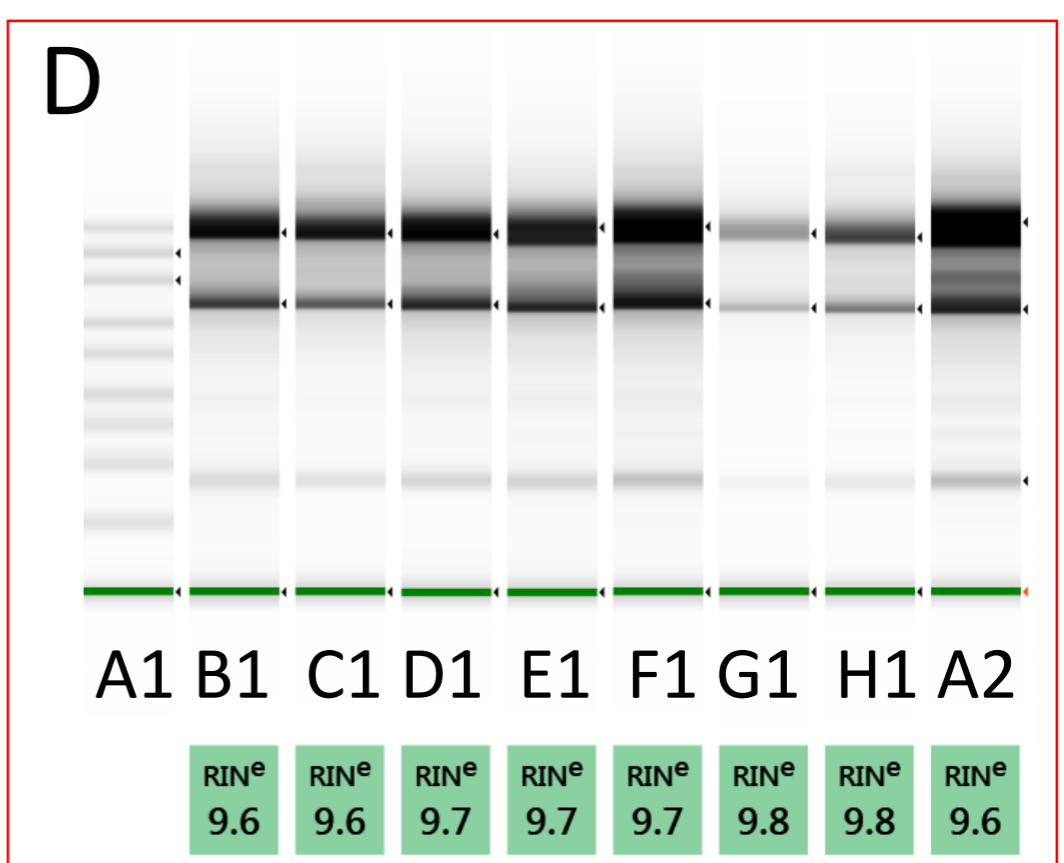

Figure 2

[Click here to access/download;Figure;Figure2.jpg](#)

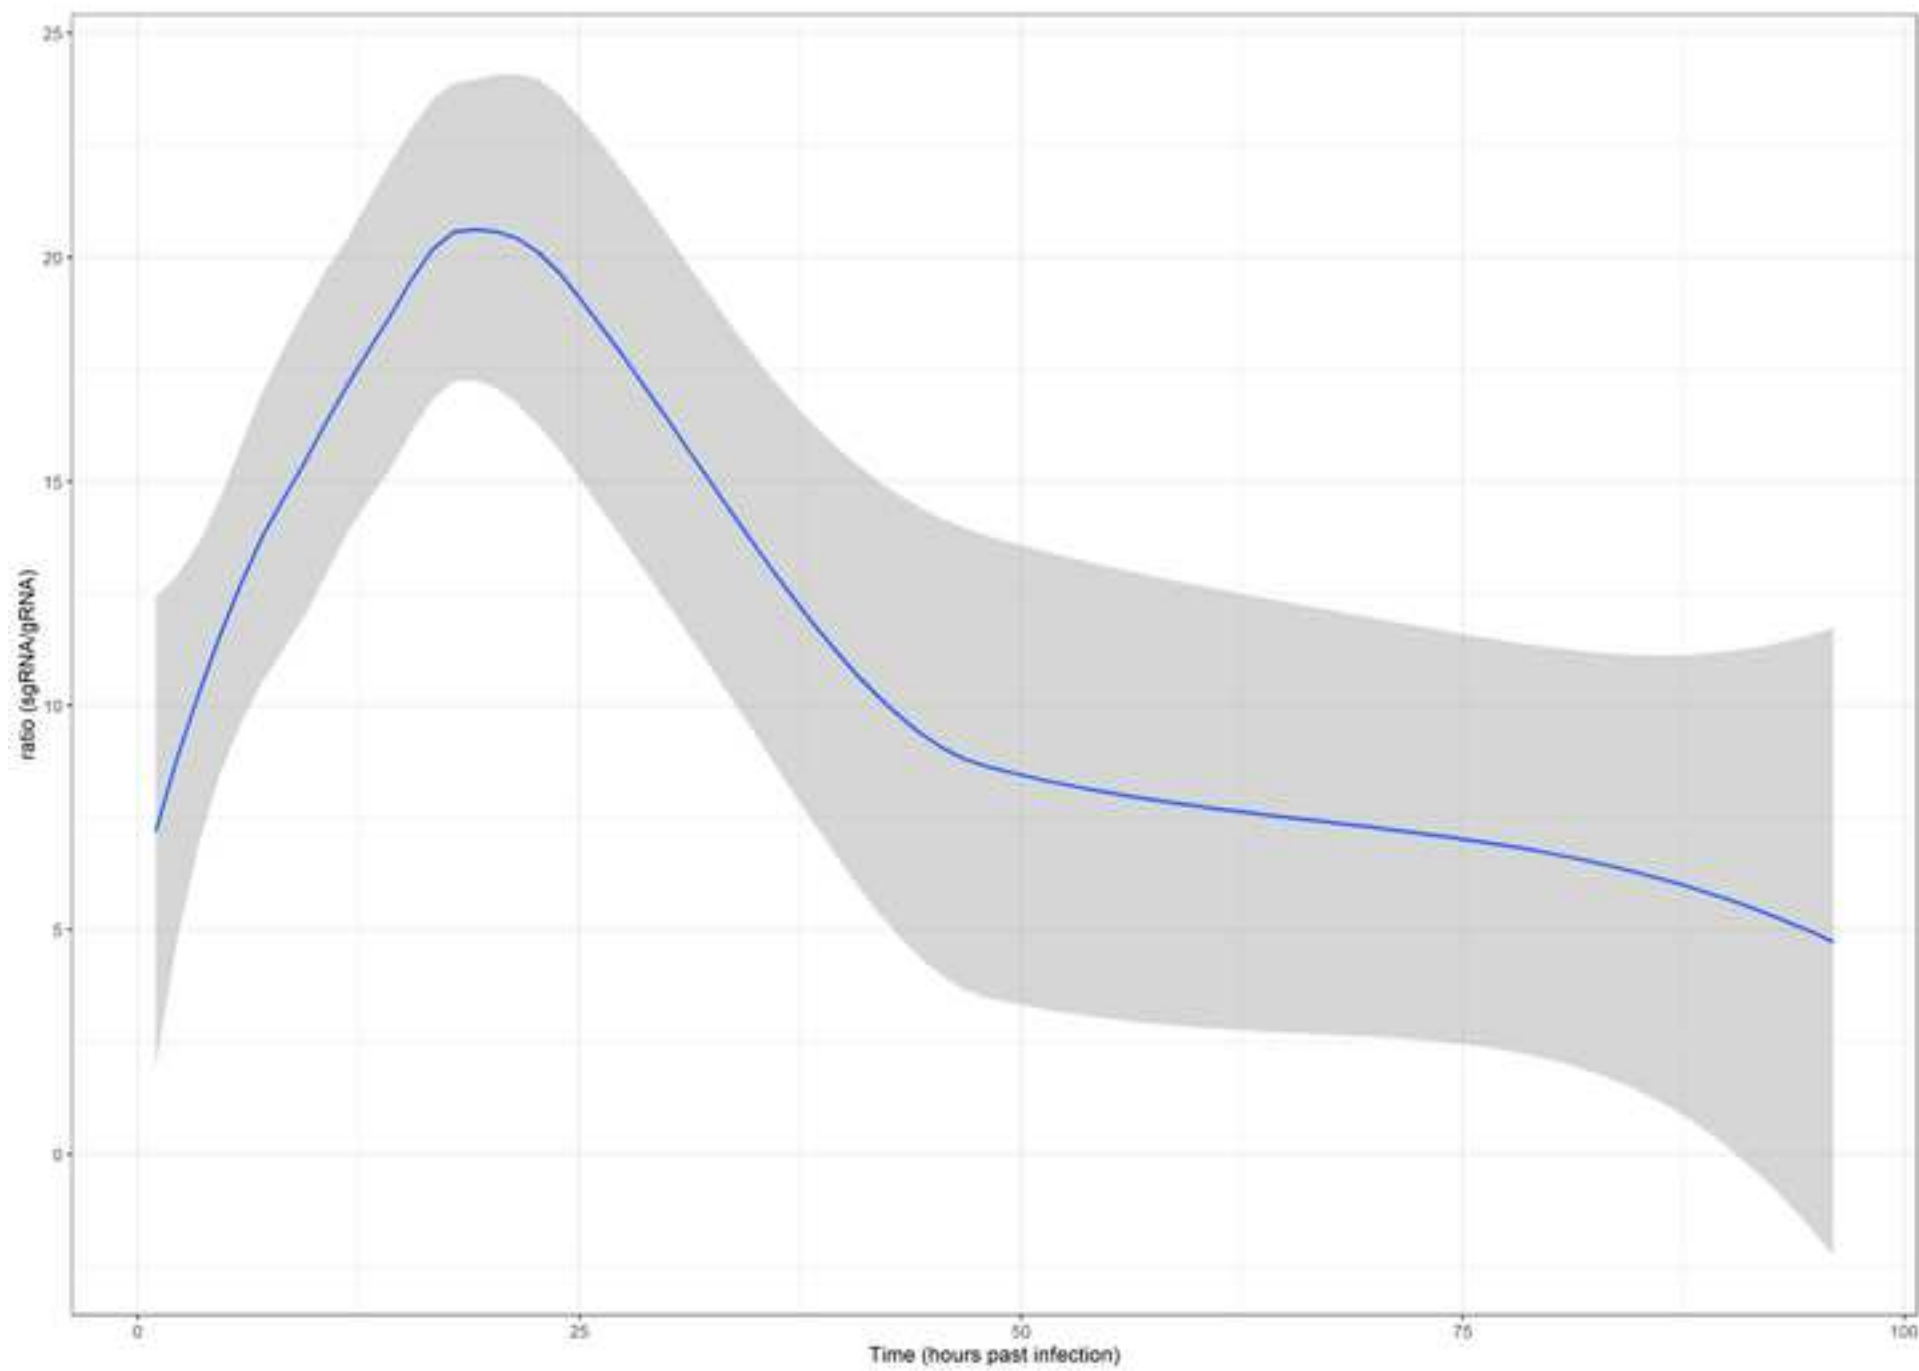



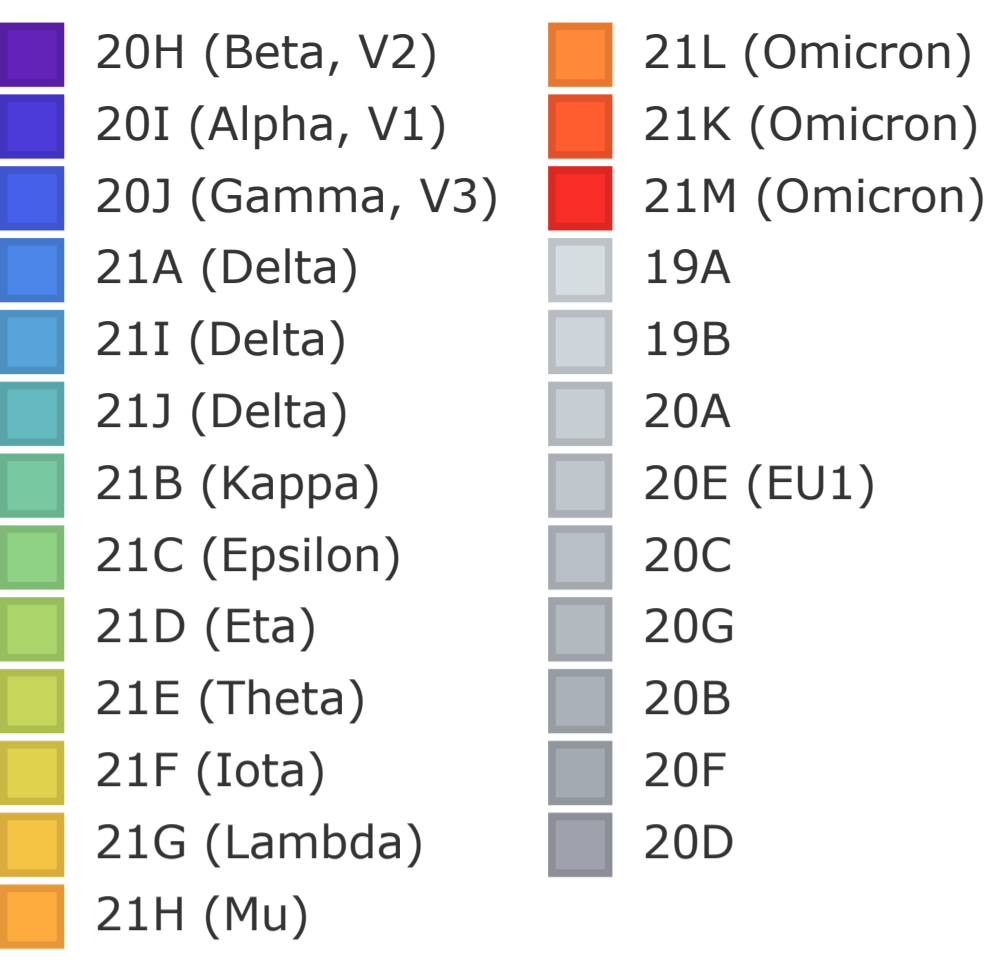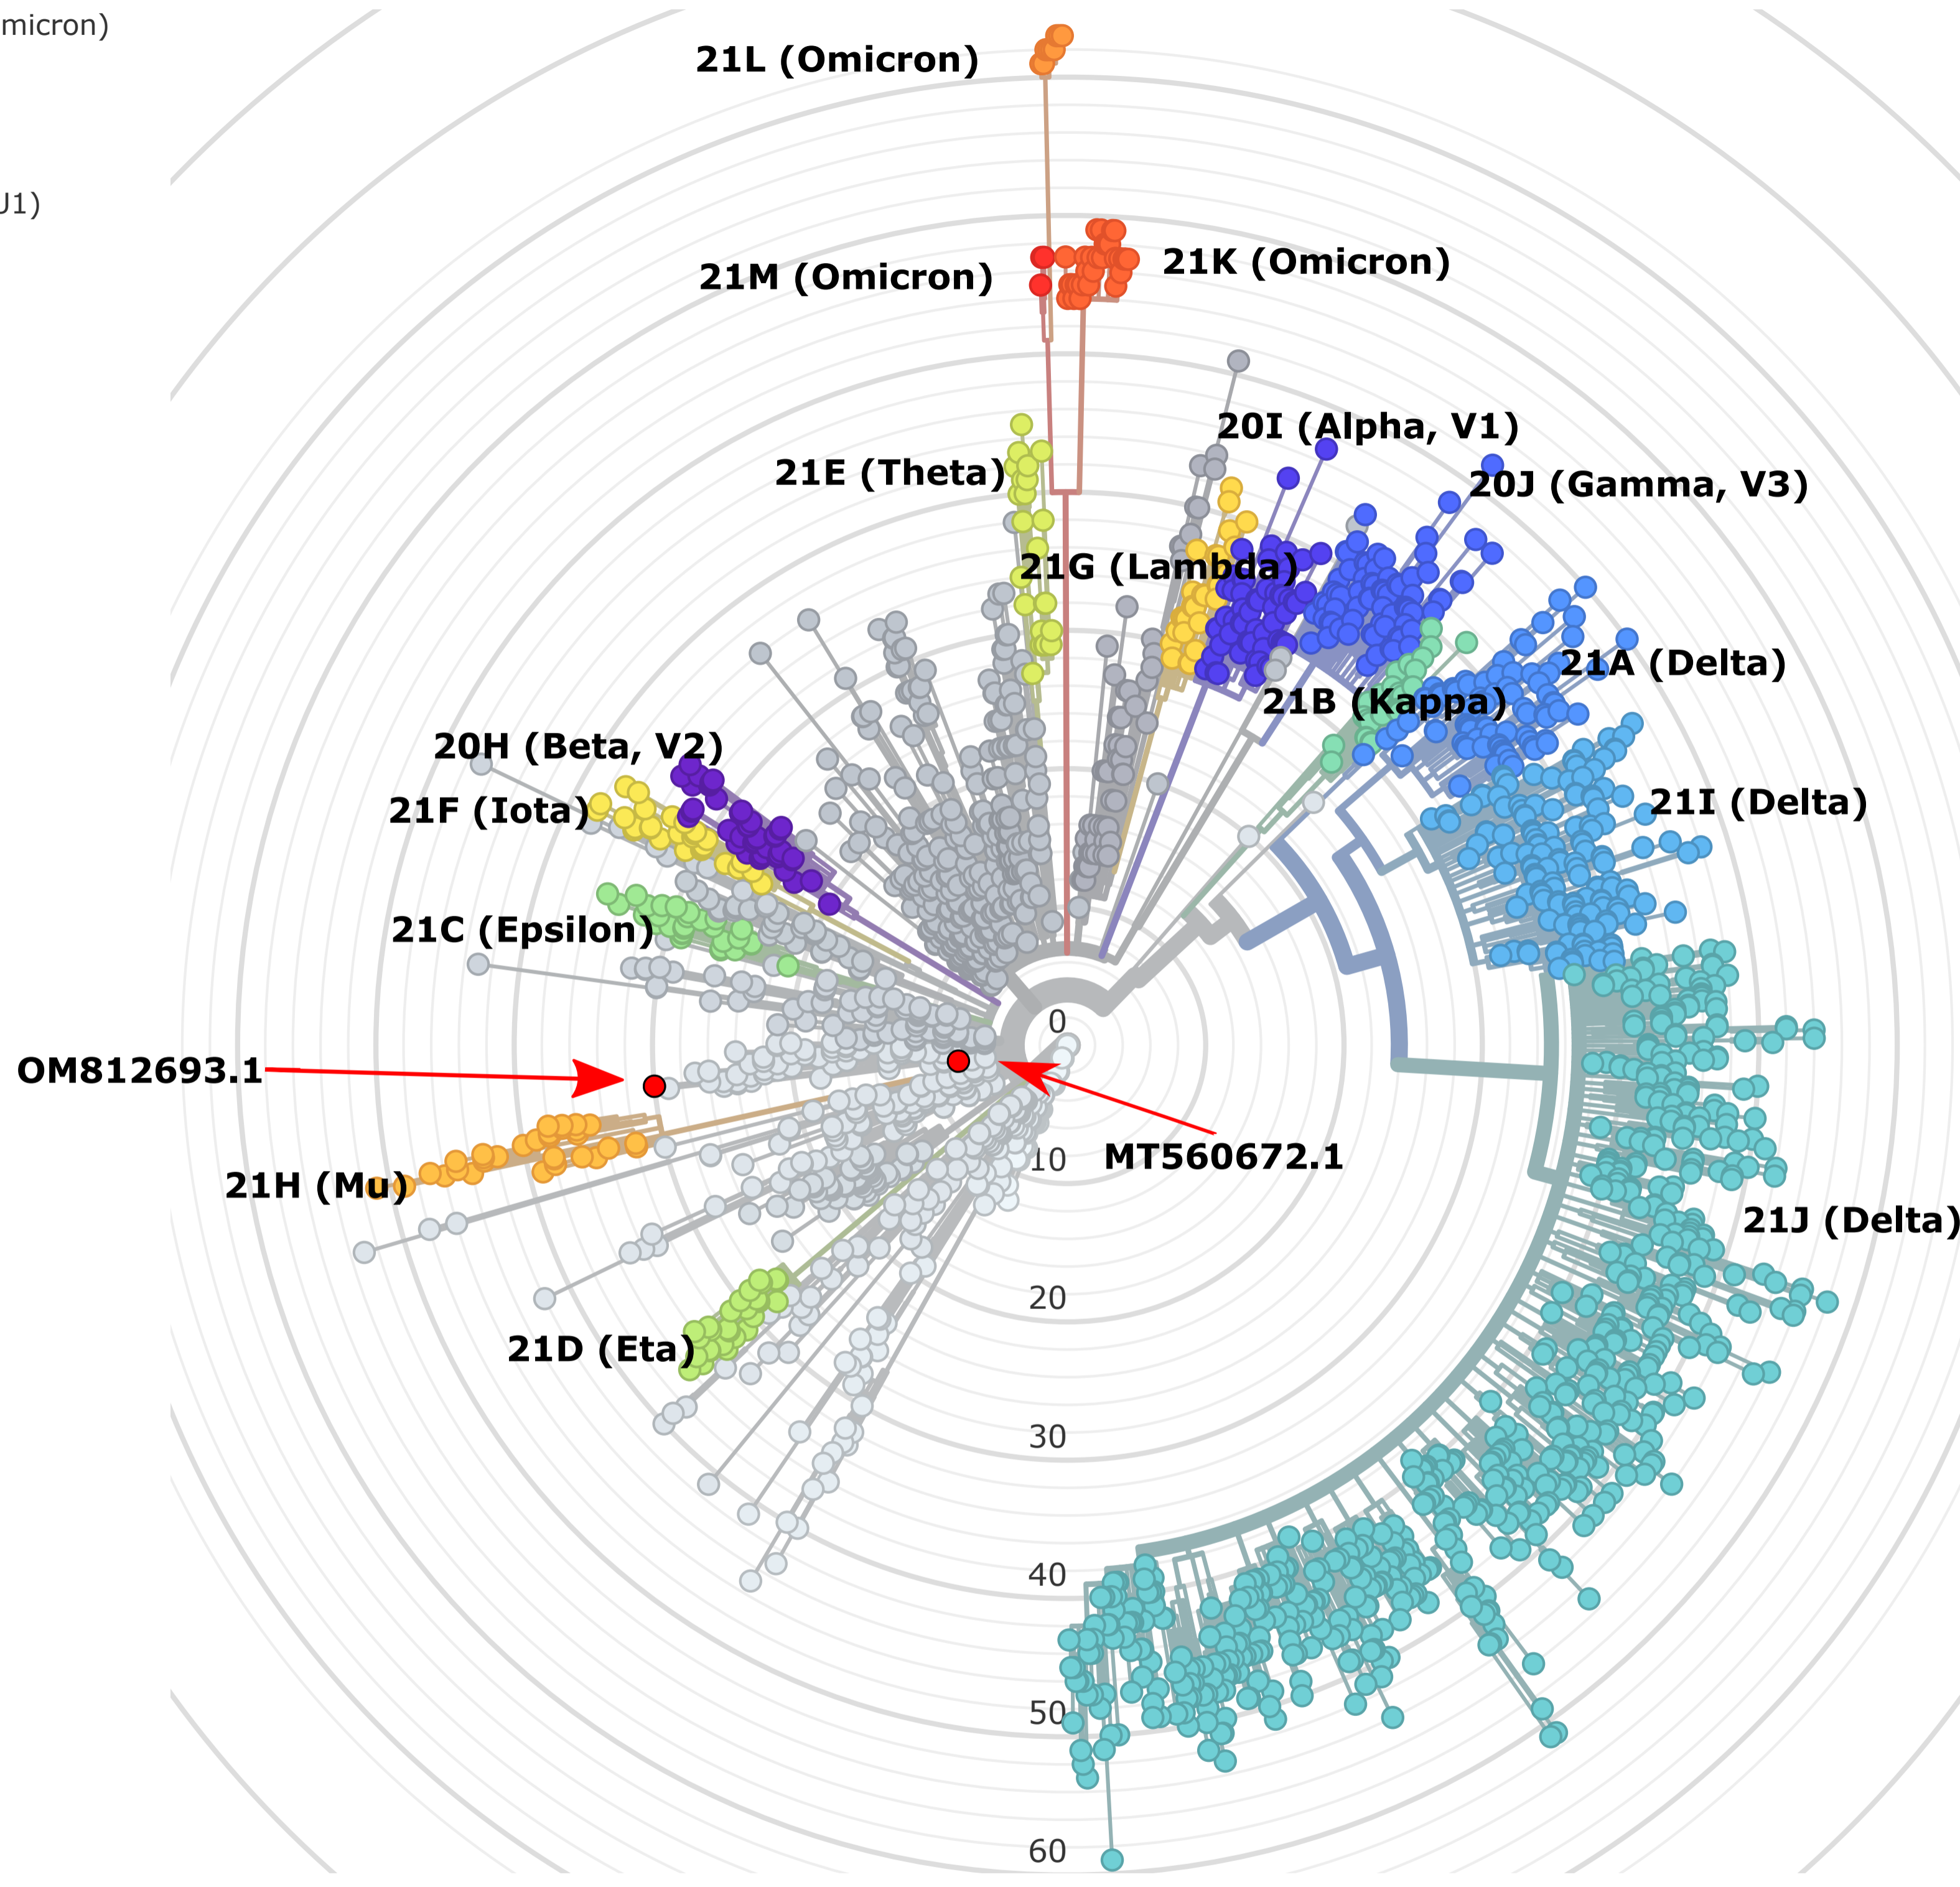

Figure 4

[Click here to access/download;Figure;Figure4.tif](#)

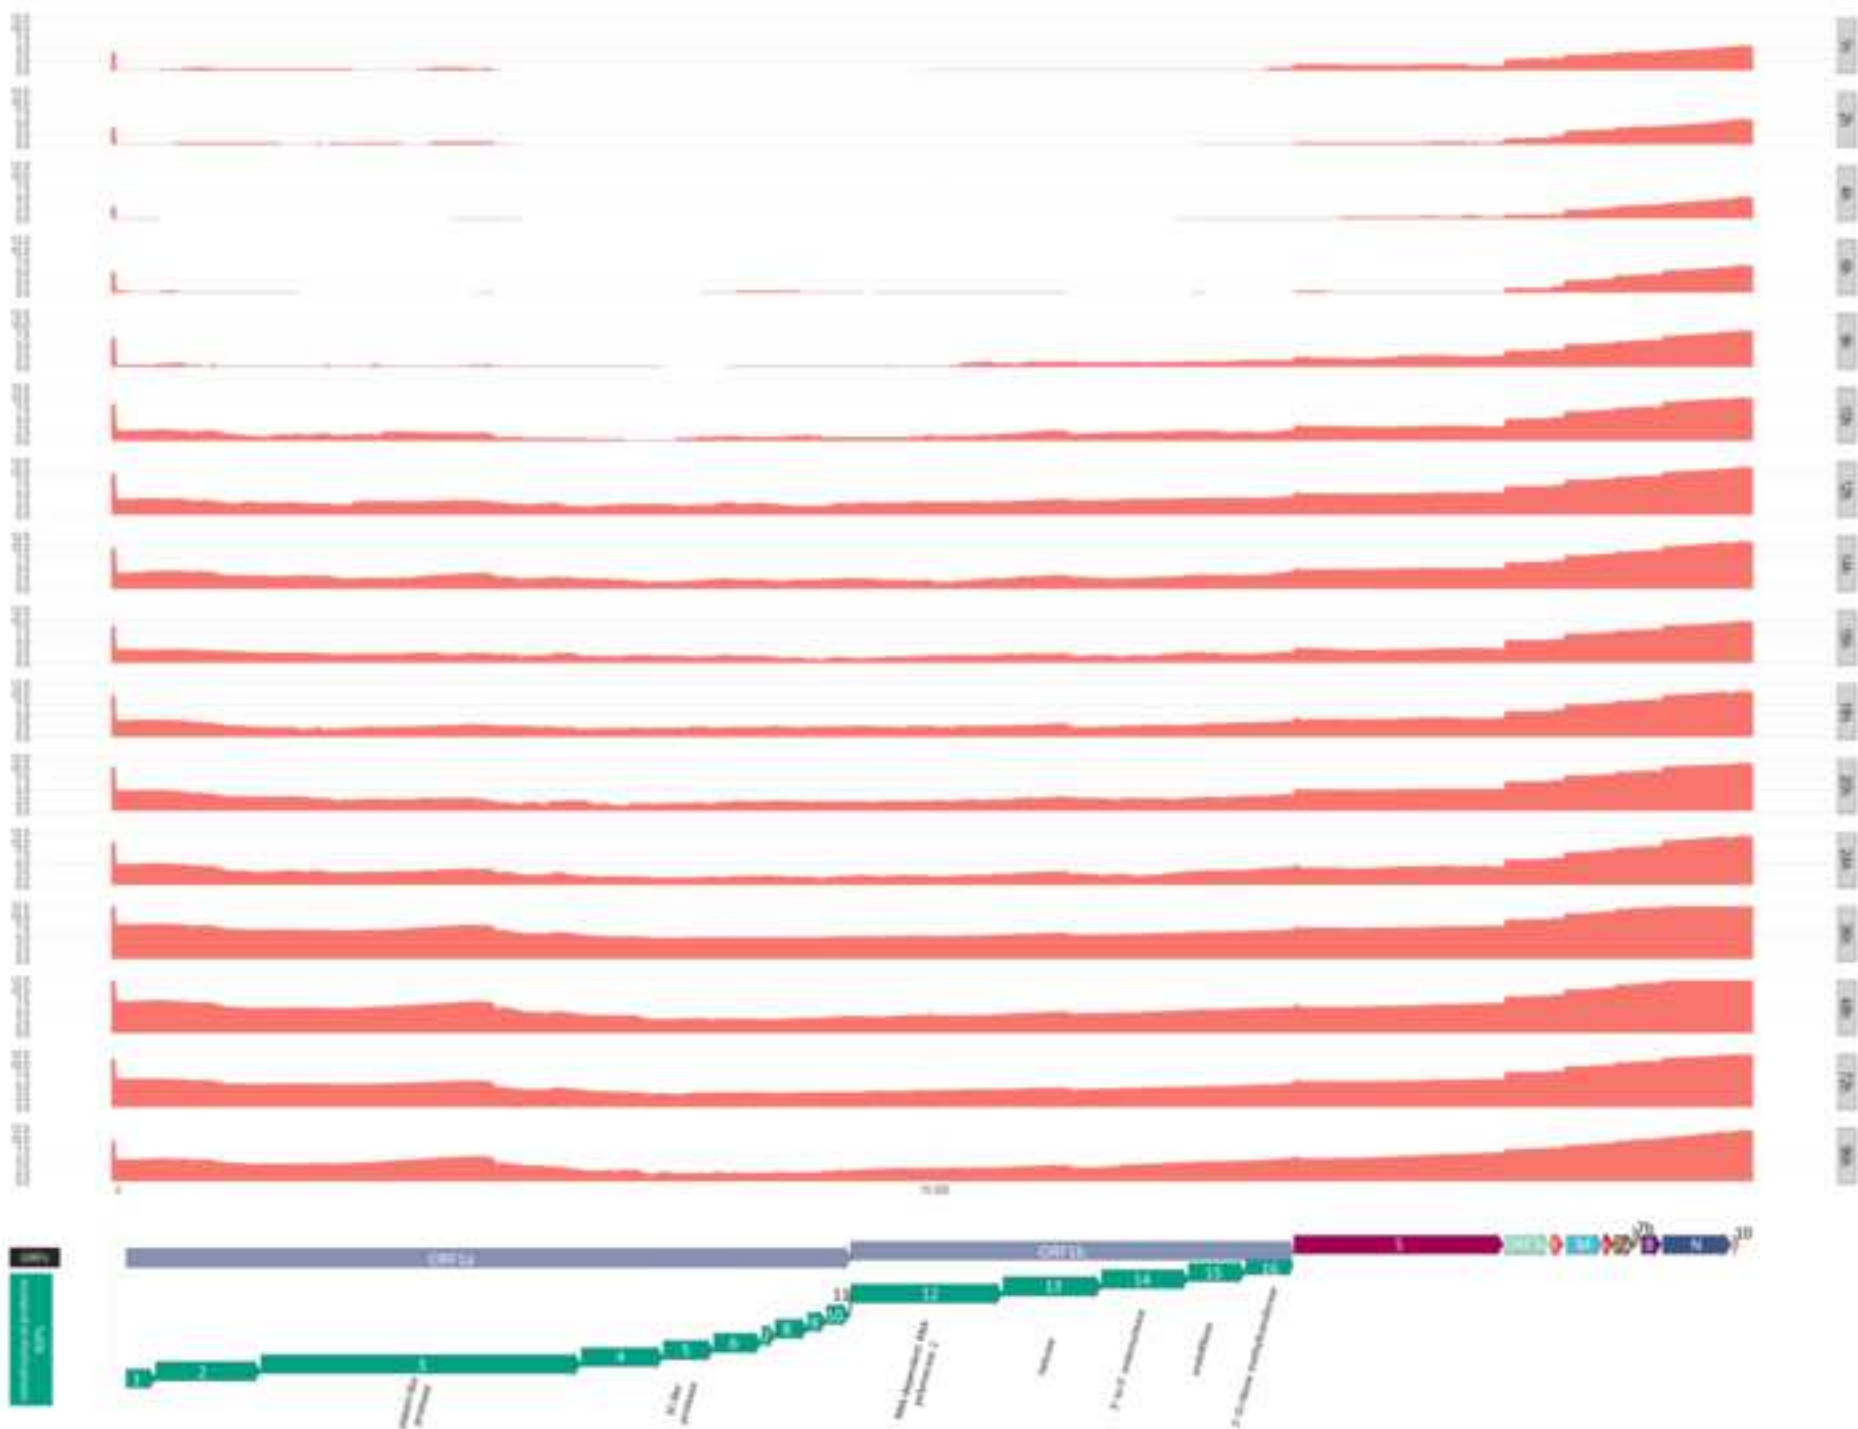

Figure 5

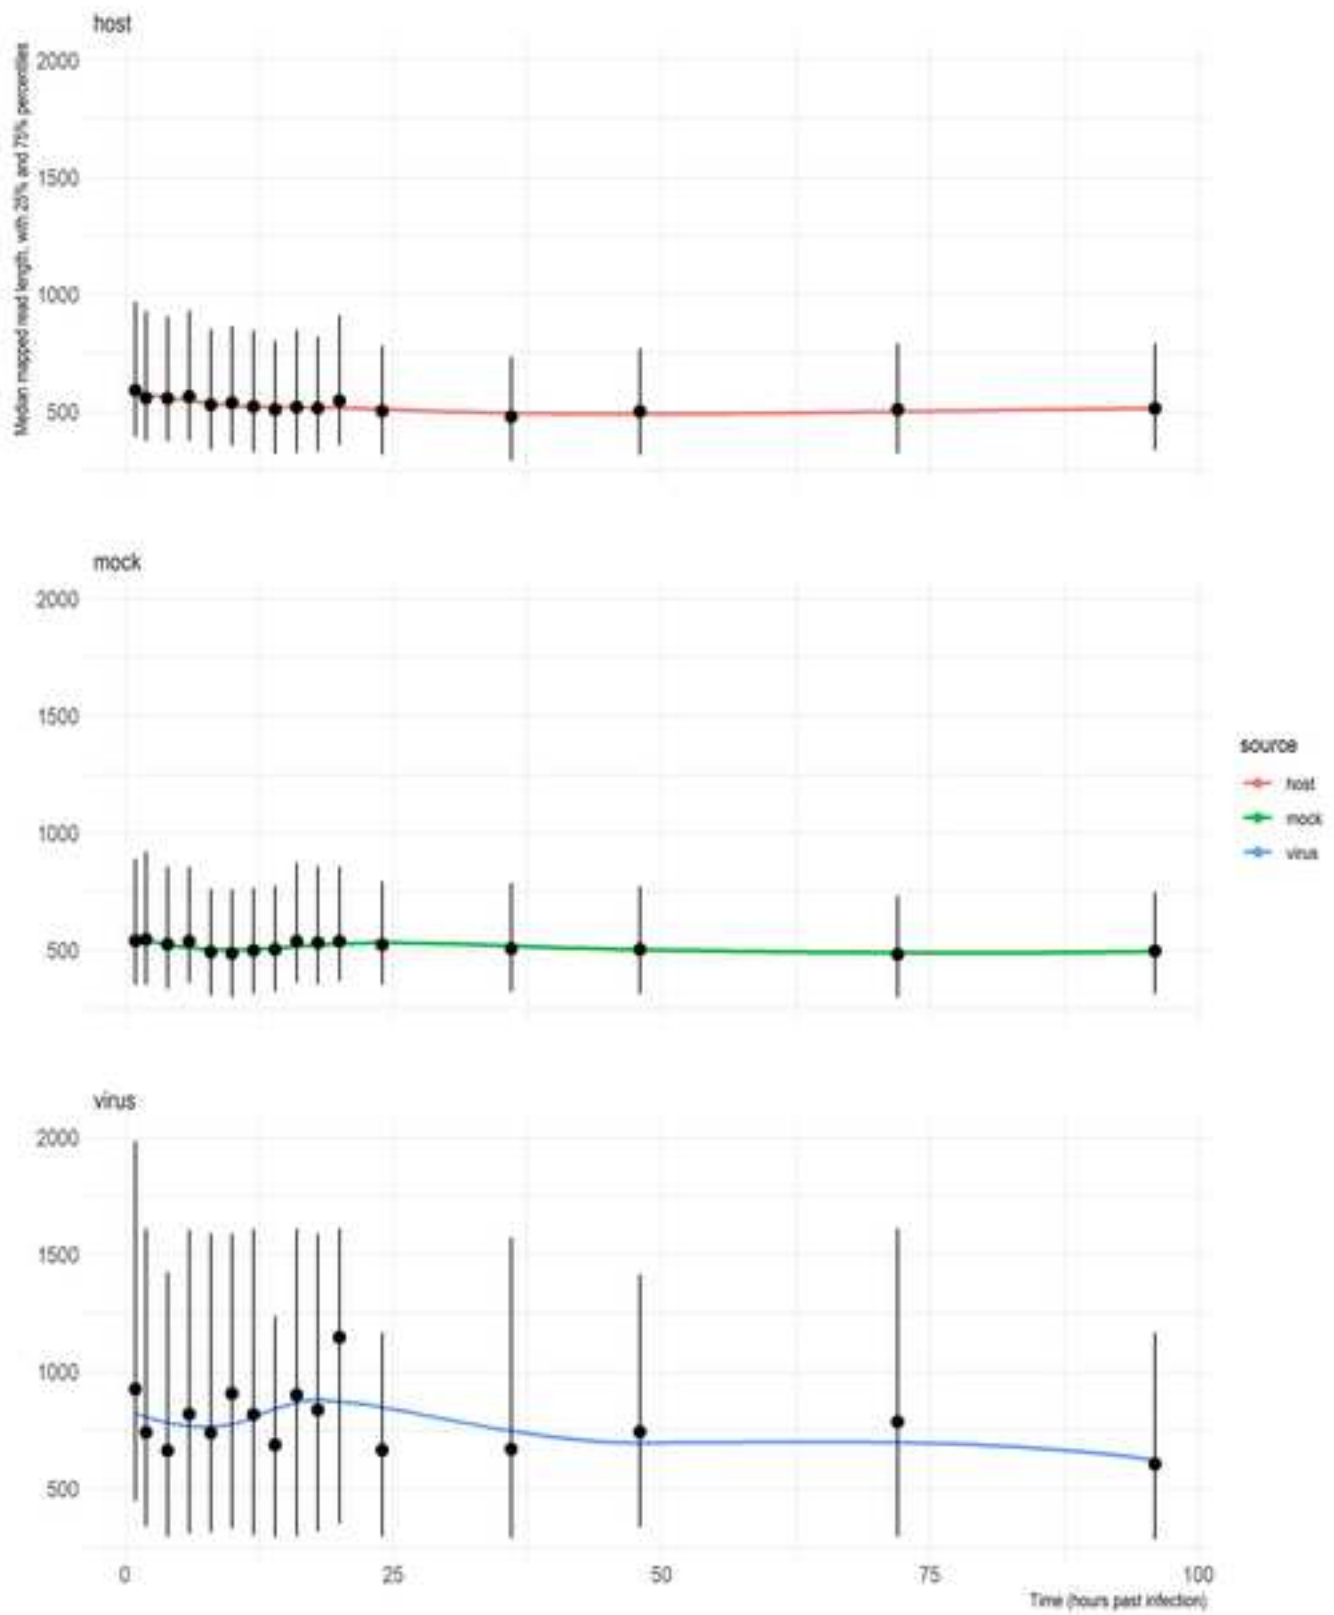

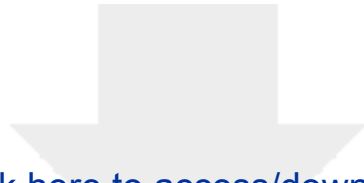

[Click here to access/download](#)

**Supplementary Material**

[SupplementaryInfoS1\\_VirStrain\\_report.txt](#)

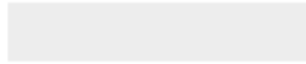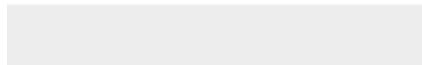

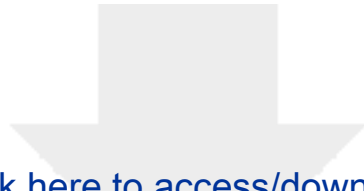

[Click here to access/download](#)

**Supplementary Material**

[SupplementaryInfoS2\\_Nextstrain\\_phylogenic\\_tree.nwk](#)

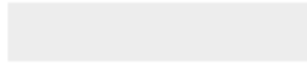





[Click here to access/download](#)

**Supplementary Material**

[SupplementaryInfoS3\\_nextclade.aligned.fasta](#)





[Click here to access/download](#)

**Supplementary Material**

[SupplementaryInfoS3\\_nextclade.auspice.json](#)

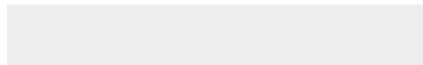



Click here to access/download  
**Supplementary Material**  
SupplementaryInfoS3\_nextclade.csv

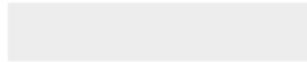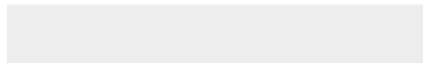



[Click here to access/download](#)

**Supplementary Material**

[SupplementaryInfoS3\\_nextclade.errors.csv](#)





[Click here to access/download](#)

**Supplementary Material**

[SupplementaryInfoS3\\_nextclade.insertions.csv](#)





Click here to access/download

**Supplementary Material**

SupplementaryInfoS3\_nextclade.json

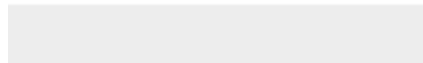



[Click here to access/download](#)

**Supplementary Material**

[SupplementaryInfoS3\\_nextclade.peptide.E.fasta](#)



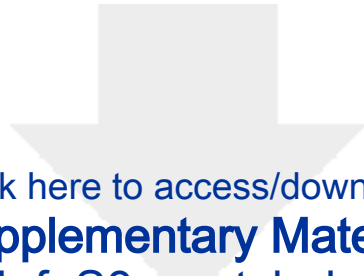

[Click here to access/download](#)

**Supplementary Material**

[SupplementaryInfoS3\\_nextclade.peptide.M.fasta](#)







[Click here to access/download](#)

**Supplementary Material**

[SupplementaryInfoS3\\_nextclade.peptide.N.fasta](#)





[Click here to access/download](#)

**Supplementary Material**

[SupplementaryInfoS3\\_nextclade.peptide.ORF1a.fasta](#)





[Click here to access/download](#)

**Supplementary Material**

[SupplementaryInfoS3\\_nextclade.peptide.ORF1b.fasta](#)





[Click here to access/download](#)

**Supplementary Material**

[SupplementaryInfoS3\\_nextclade.peptide.ORF3a.fasta](#)

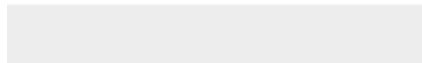



[Click here to access/download](#)

**Supplementary Material**

[SupplementaryInfoS3\\_nextclade.peptide.ORF6.fasta](#)

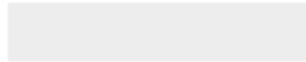



[Click here to access/download](#)

**Supplementary Material**

[SupplementaryInfoS3\\_nextclade.peptide.ORF7a.fasta](#)





[Click here to access/download](#)

**Supplementary Material**

[SupplementaryInfoS3\\_nextclade.peptide.ORF7b.fasta](#)





[Click here to access/download](#)

**Supplementary Material**

[SupplementaryInfoS3\\_nextclade.peptide.ORF8.fasta](#)







[Click here to access/download](#)

**Supplementary Material**

[SupplementaryInfoS3\\_nextclade.peptide.ORF9b.fasta](#)





[Click here to access/download](#)

**Supplementary Material**

[SupplementaryInfoS3\\_nextclade.peptide.S.fasta](#)





Click here to access/download  
**Supplementary Material**  
SupplementaryInfoS3\_nextclade.tsv

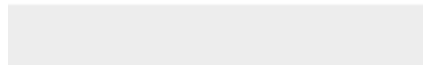

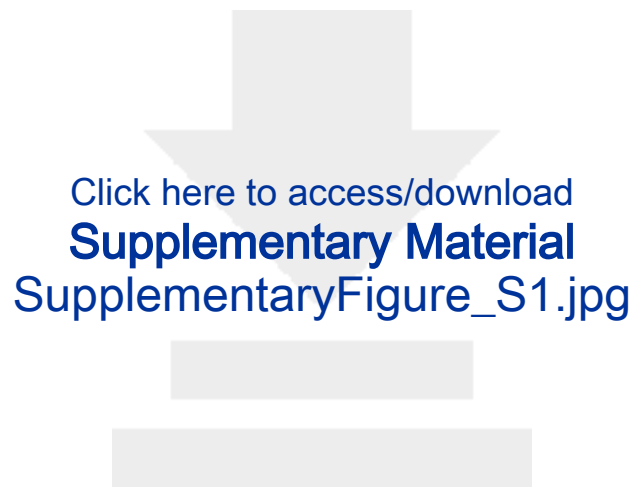



Click here to access/download

**Supplementary Material**

[SupplementaryFigureS2\\_VirStrain\\_report.html](#)



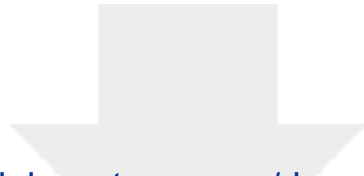

Click here to access/download  
**Supplementary Material**  
SupplementaryFigureS3.jpg





[Click here to access/download](#)

**Supplementary Material**

[SupplementaryFigureS4\\_read\\_coverage.png](#)



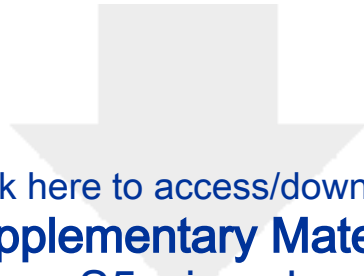

[Click here to access/download](#)

**Supplementary Material**

[SupplementaryFigureS5\\_virus\\_host\\_read\\_counts.png](#)







Click here to access/download  
**Supplementary Material**  
SupplementaryTableS1.xlsx

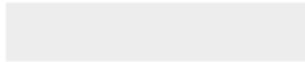



Click here to access/download  
**Supplementary Material**  
SupplementaryTableS2.csv





Click here to access/download  
**Supplementary Material**  
SupplementaryTableS3.xlsx





Click here to access/download  
**Supplementary Material**  
SupplementaryTableS4.xlsx



Supplement: giac094_giga-d-22-00028_revision_1.pdf [file giac094_giga-d-22-00028_revision_1.pdf]
