# Supplementary material for: High temporal resolution Nanopore sequencing dataset of SARS-CoV-2 and host cell RNAs
Source: PubMed Central journal article supplement (PMC9575581; doi:10.1093/gigascience/giac094), 2022-10-17
Supplement: giac094_response_to_reviewer_comments_revision_1.pdf [file giac094_response_to_reviewer_comments_revision_1.pdf]

## Author's Response To Reviewer Comments

Close

Dear Hans,  
Thank you for your feedback and suggestions.  
We completed all the necessary corrections in the manuscript, including:

- provided reference for the GigaDB dataset
- omitted the Source code availability section
- removed highlights and tracking
- corrected the BioProject ID
- corrected references for supporting data
- provided numbered citations for every software used

We hope now the manuscript is apt for publication.

Close
